# Supplementary material for: Structure-guided and phage-assisted evolution of a therapeutic anti-EGFR antibody to reverse acquired resistance
Source: PubMed Central journal article supplement (PMC9338999; doi:10.1038/s41467-022-32159-6), 2022-07-30

## **Supplementary Information**

### **Structure-guided and phage-assisted evolution of a therapeutic anti-EGFR antibody to reverse acquired resistance**

Xinlei Zhuang<sup>1</sup>, Zhe Wang<sup>1</sup>, Jiansheng Fan<sup>1</sup>, Xuefei Bai<sup>1</sup>, Yingchun Xu<sup>1</sup>, James J. Chou<sup>2</sup>, Tingjun Hou<sup>1</sup>, Shuqing Chen<sup>1,3\*</sup> and Liqiang Pan<sup>1,4\*</sup>

1. Institute of Drug Metabolism and Pharmaceutical Analysis, College of Pharmaceutical Sciences, Zhejiang University, Hangzhou 310058, China.
2. Department of Biological Chemistry and Molecular Pharmacology, Harvard Medical School, 250 Longwood Avenue, Boston, MA 02115.
3. Department of Precision Medicine on Tumor Therapeutics, ZJU-Hangzhou Global Scientific and Technological Innovation Center, Hangzhou 311200, China.
4. The First Affiliated Hospital, Zhejiang University School of Medicine, Hangzhou 310003, China; Key Laboratory of Pancreatic Disease of Zhejiang Province, Hangzhou 310003, China.

\*Correspondence:

Shuqing Chen ([chenshuqing@zju.edu.cn](mailto:chenshuqing@zju.edu.cn)) or Liqiang Pan ([panliqiang@zju.edu.cn](mailto:panliqiang@zju.edu.cn))

## Supplementary Figures

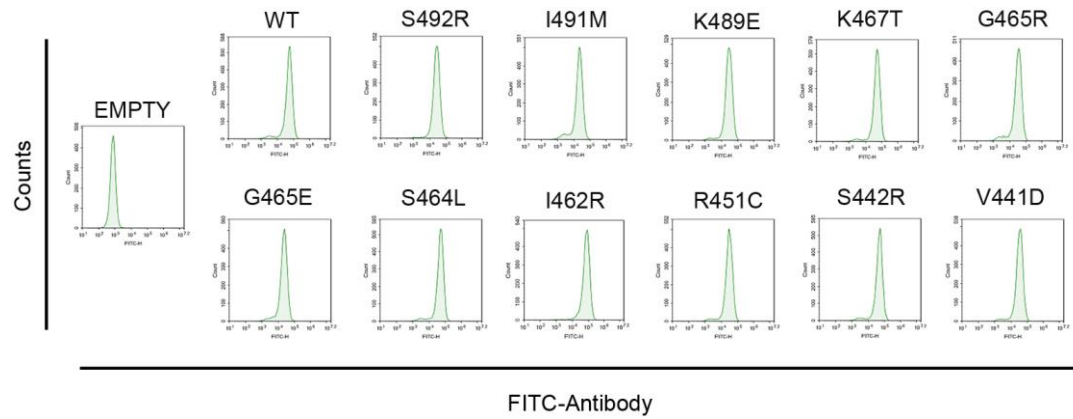

**Supplementary Fig. 1. Identification of EGFR<sup>WT</sup> or EGFR<sup>Mut</sup> NIH3T3 stable cells, Related to Fig. 1.**

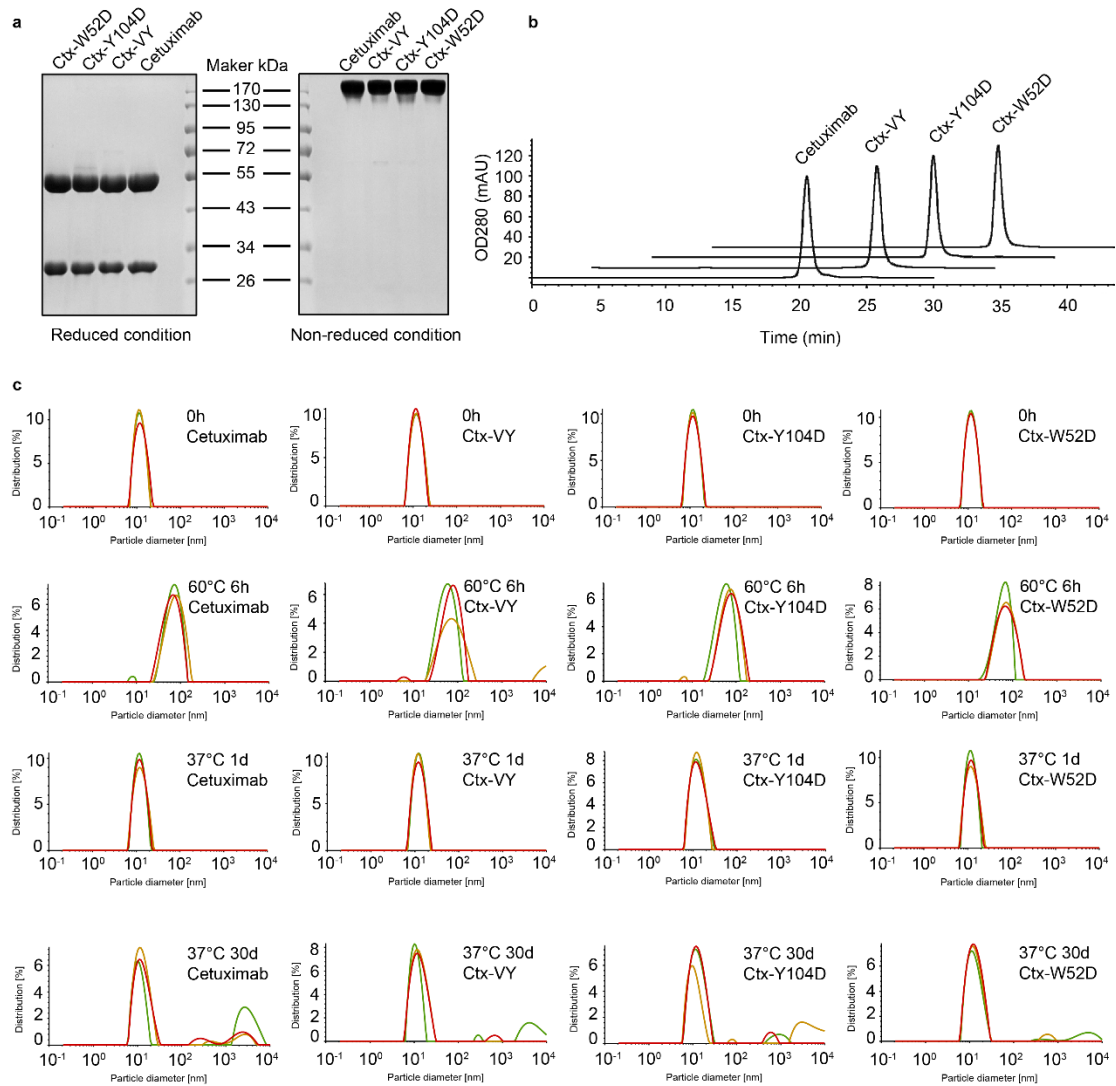

**Supplementary Fig. 2. The stability and oligomerization state of the cetuximab and cetuximab variants, Related to Fig. 4.**

**(a)** The reducing and nonreducing SDS–PAGE results for purified cetuximab and its variants. **(b)** The size-exclusion chromatography results for cetuximab and its variants. **(c)** Measurement of aggregation formation in cetuximab and cetuximab variants after incubation at 60°C and 37°C by DLS. Source data are provided as a Source Data file.

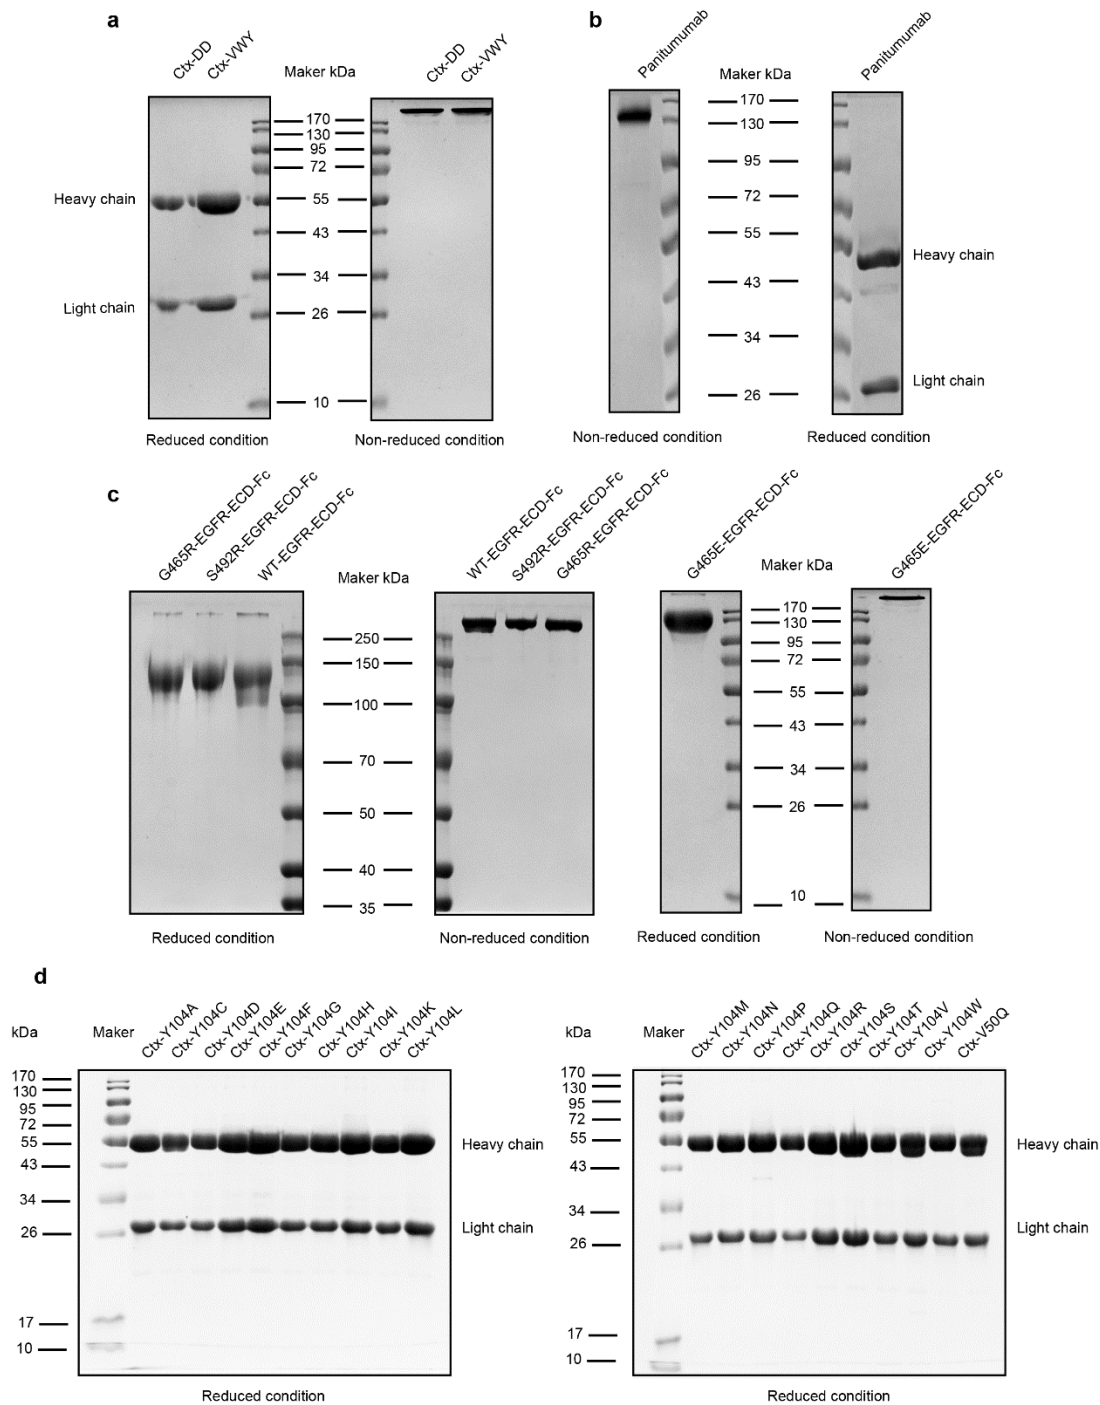

**Supplementary Fig. 3. Characterization of the purified anti-EGFR antibodies, and EGFR-ECD-Fc protein, Related to Fig. 4.**

**(a)** The reducing and non-reducing SDS-PAGE results of the purified panitumumab under reduced and non-reduced condition. **(b)** The reducing and non-reducing SDS-PAGE results of the purified Ctx-DD and Ctx-VWY. **(c)** The reducing and non-reducing SDS-PAGE results of the purified WT-EGFR-ECD-Fc, S492R-EGFR-ECD-Fc,

G465R-EGFR-ECD-Fc and G465E-EGFR-ECD-Fc protein. **(d)** The reducing SDS-PAGE result of the purified Ctx-Y104X and Ctx-V50Q. Source data are provided as a Source Data file.

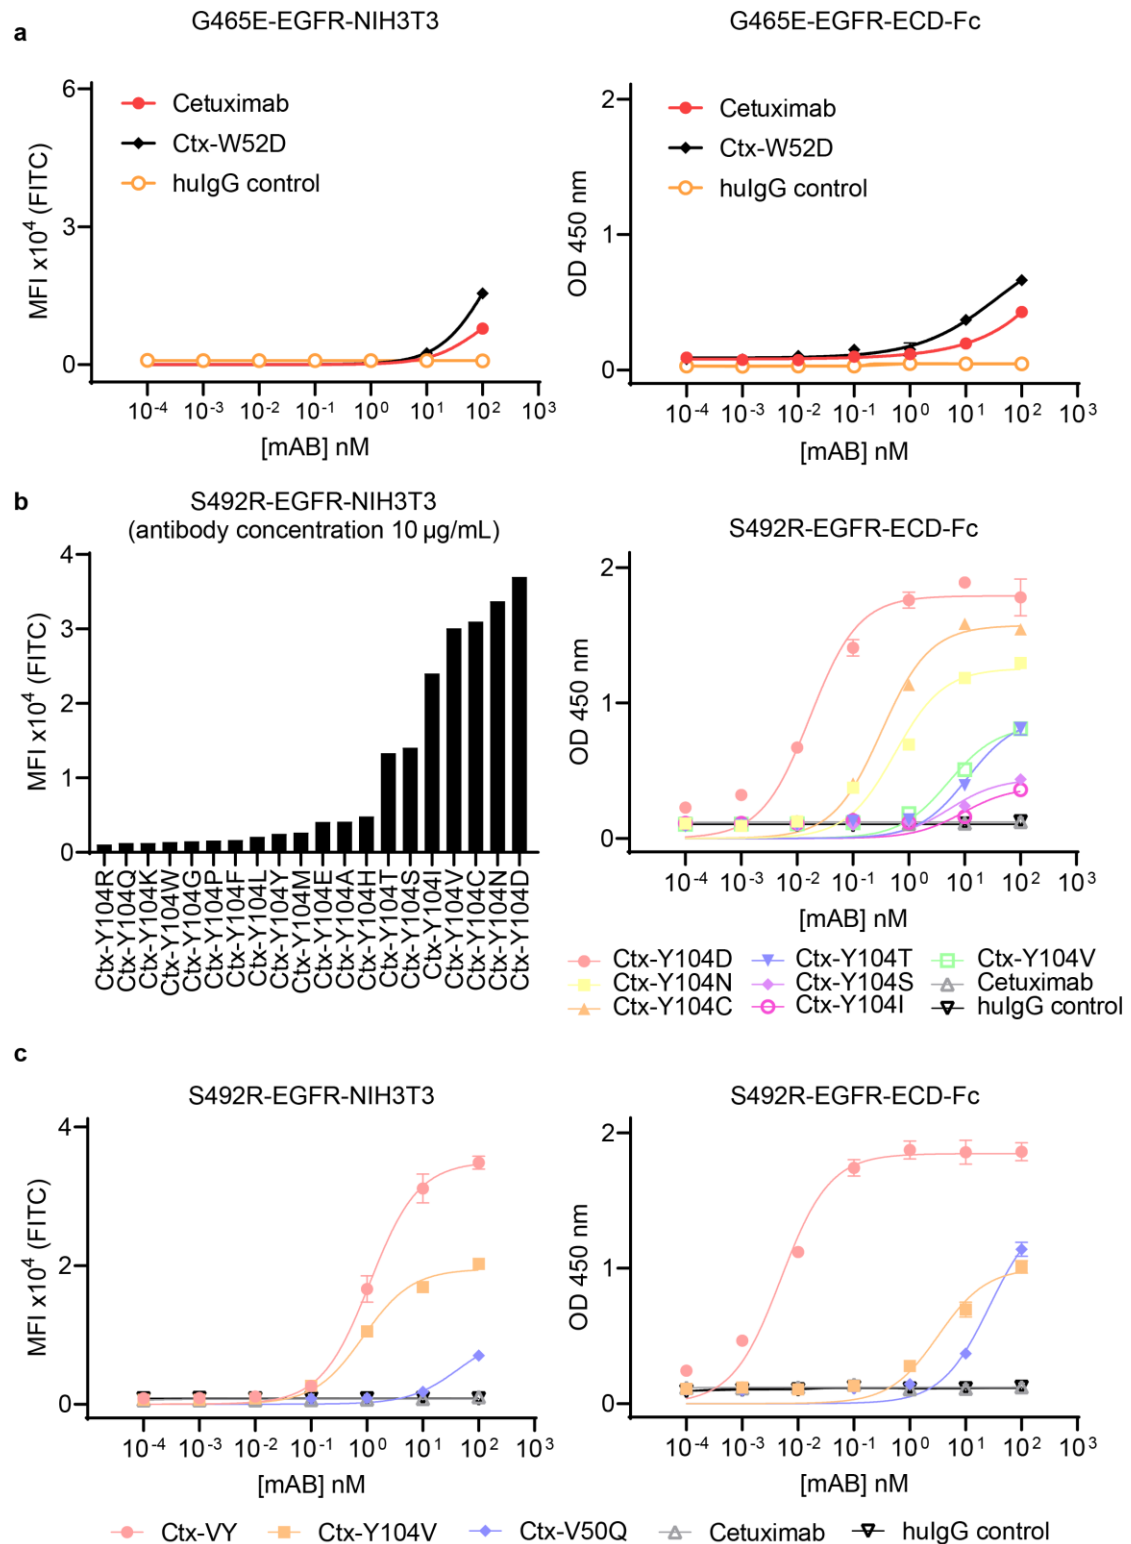

**Supplementary Fig. 4. The binding ability of cetuximab variants with mutated EGFR, Related to Fig. 4.**

**(a)** The binding ability of cetuximab and Ctx-W52D with (left panel) NIH3T3 cells expressing EGFR<sup>G465E</sup> or with (right panel) G465E-EGFR-ECD-Fc fusion protein. All

data are shown in mean  $\pm$  SD values, n=3. **(b)** Site saturation mutagenesis of the Y104 residue of cetuximab and its effect on reversing EGFR<sup>S492R</sup>-mediated resistance. The binding affinity of Ctx-Y104X for S492R-EGFR-NIH3T3 cells was evaluated by flow cytometry (left panel). The binding affinity of the top 7 high-affinity cetuximab variants for S492R-EGFR-ECD-Fc protein was further analyzed by ELISA (right panel). All data are shown in mean  $\pm$  SD values, n=3. **(c)** The effect of two substitutions on the binding affinity of Ctx-VY for EGFR<sup>S492R</sup>. The binding ability with S492R-EGFR-NIH3T3 cells was determined by flow cytometry (left panel) and with the S492R-EGFR-ECD-Fc protein by ELISA (right panel). All data are shown in mean  $\pm$  SD values, n=3. Source data are provided as a Source Data file.

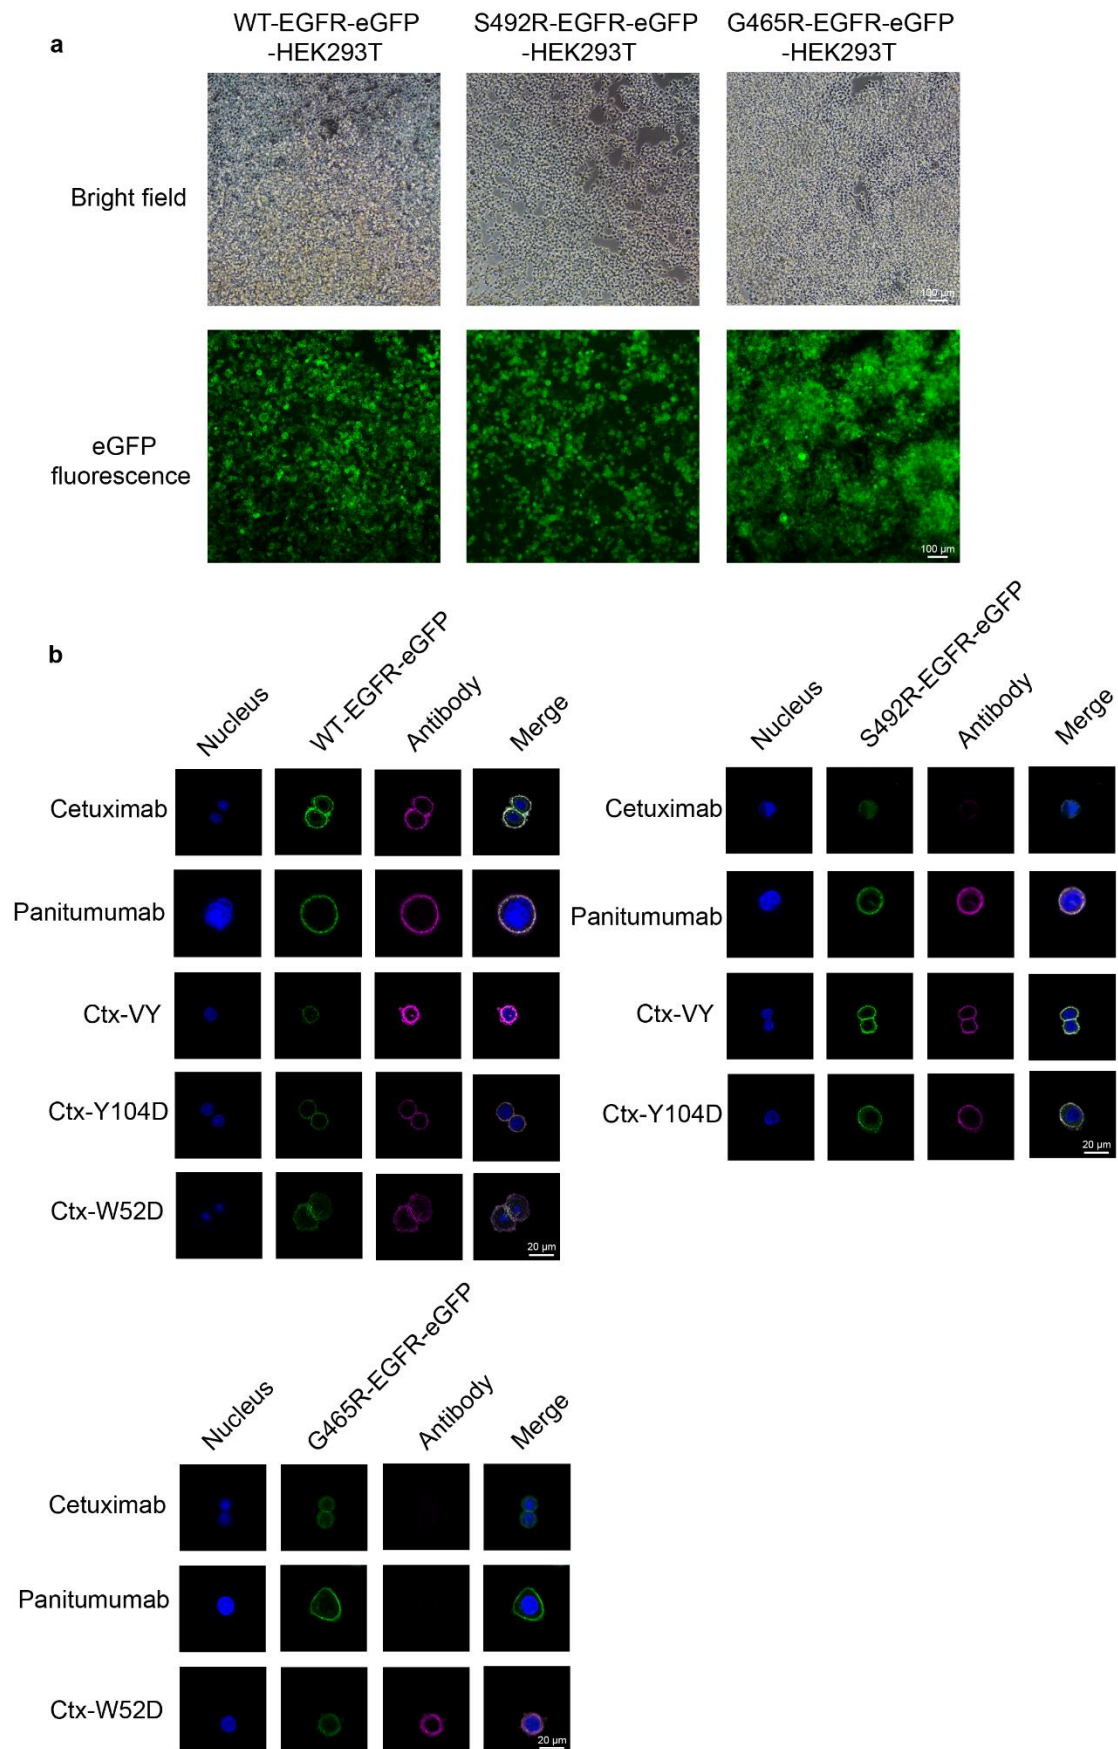

**Supplementary Fig. 5. Confocal imaging of HEK293T cells expressing full-length WT-EGFR-eGFP, S492R-EGFR-eGFP and G465R-EGFR-eGFP after**



**immunostaining by cetuximab variants, Related to Fig. 5.**

**(a)** Identification of the EGFR-eGFP expression in HEK293T stable cell Lines. Scale bars: 100  $\mu$ m. **(b)** The cell-surface expression of WT-/Mut- EGFR in HEK293T stable cell lines. Scale bars: 20  $\mu$ m.

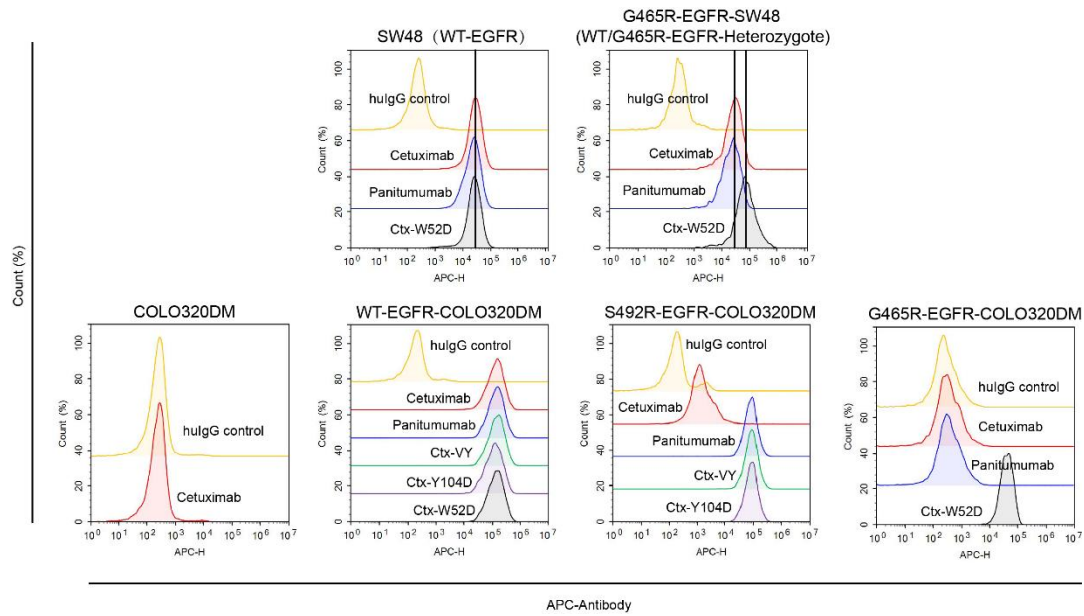

**Supplementary Fig. 6. The cell-surface expression of WT-/Mut- EGFR in SW48 (WT-EGFR), COLO320DM, WT-EGFR-COLO320DM, S492R-EGFR-COLO320DM and G465R-EGFR-COLO320DM cells, Related to Figure 6 and Fig. 7.**

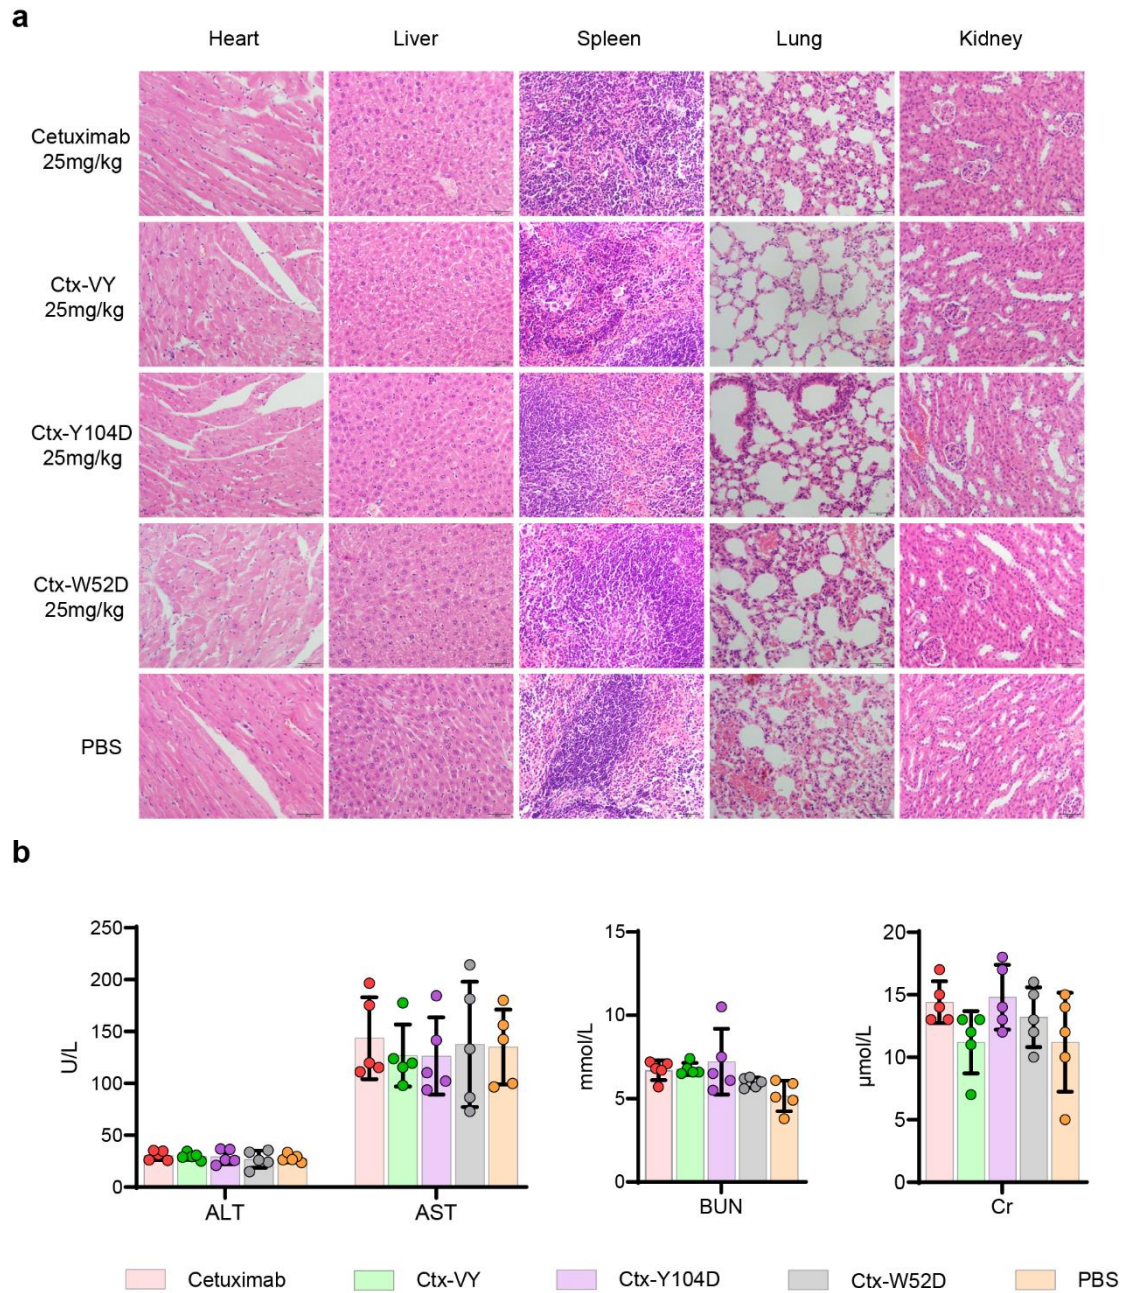

**Supplementary Fig. 7. The toxicity profile of cetuximab variants, Related to Fig. 7.**

**(a)** The H&E staining of different tissue sections from heart, liver, spleen, lung, and kidney after antibody treatment. Scale bars: 50  $\mu\text{m}$ . **(b)** Serum levels of ALT, AST, BUN, and Cr after antibody treatment. All data are shown in mean  $\pm$  SD values, n=5 mice for each group. Source data are provided as a Source Data file.

**a**

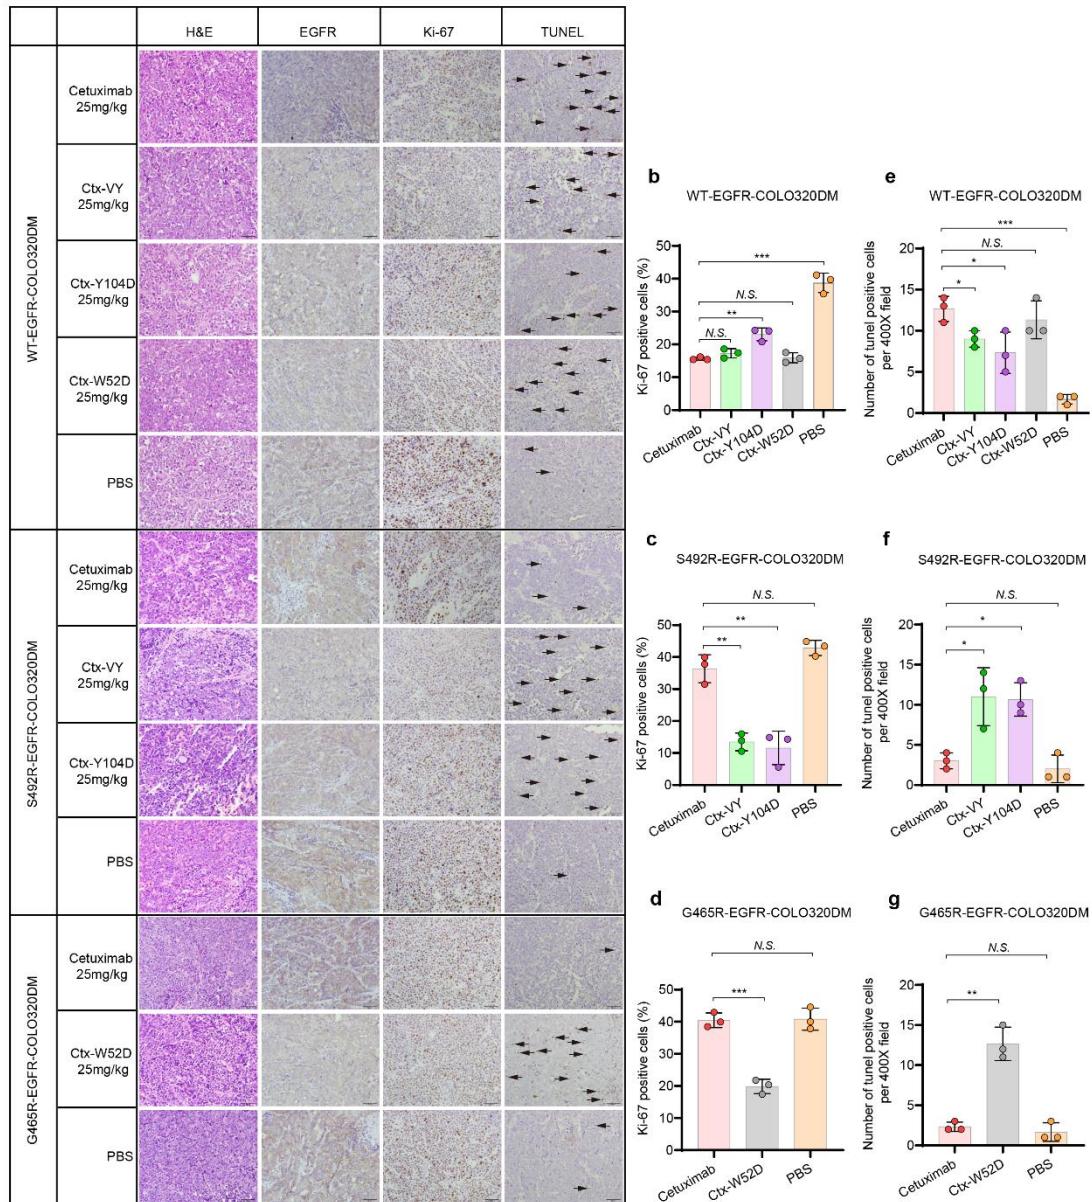

**Supplementary Fig. 8. Histological examinations of tumor tissues after administration of cetuximab and cetuximab variants, Related to Fig. 7.**

**(a)** Histological examinations of tumor tissues after H&E staining, after EGFR and Ki-67 staining, and after the TUNEL assay. Scale bar, 50  $\mu$ m. **(b, c and d)** The percentages of Ki-67-positive cells from (a). **(e, f and g)** Quantification of TUNEL-positive cells from (a). The number of positive cells was counted in three randomized microscopic fields of view. All data (b-g) are shown in mean  $\pm$  SD values, n=3 mice for each group (\* $p < 0.05$ , \*\* $p < 0.01$ , \*\*\* $p < 0.001$ , \*\*\*\* $p < 0.0001$ , N.S. means not significant; two-tailed Student's t-test.). Source data are provided as a Source Data file.



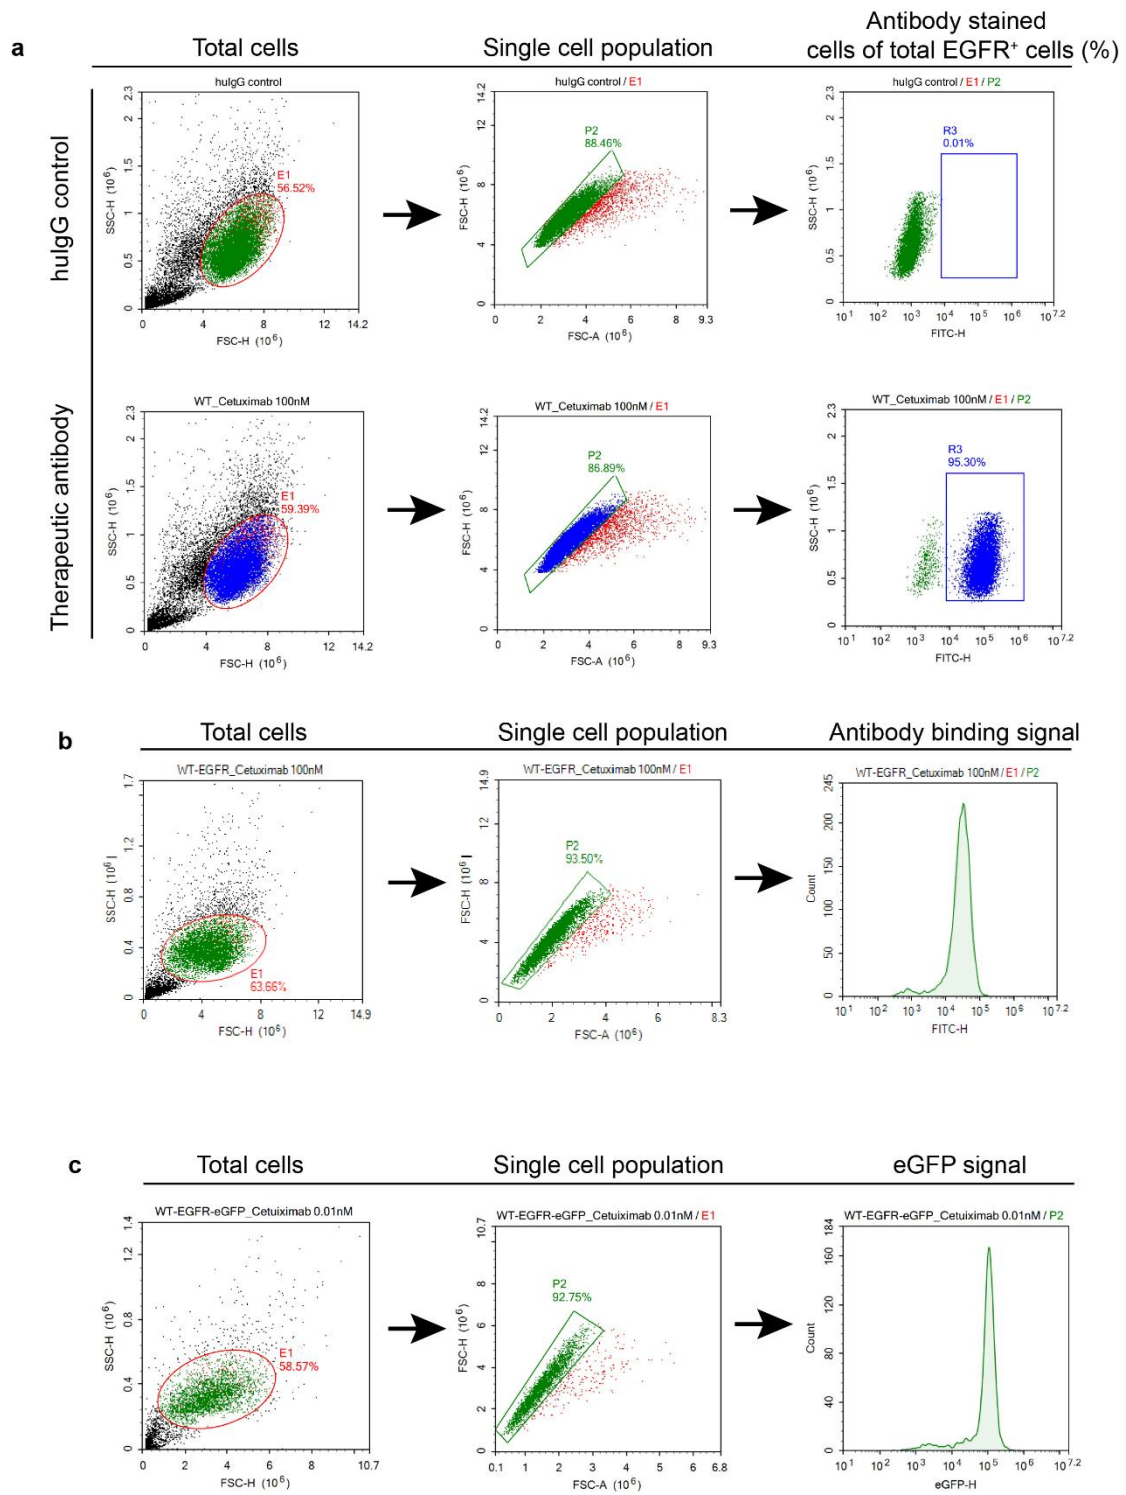

**Supplementary Fig. 9. FACS sequential gating strategies.**

**(a)** FACS sequential gating strategy related to Fig. 1b. **(b)** FACS sequential gating strategy related to Fig. 4c. **(c)** FACS sequential gating strategy related to Fig. 5d.

## Supplementary Tables

**Supplementary Table 1. The prediction results of EGFR<sup>Mut</sup>/ cetuximab interaction by Rosetta platform are consistent with the validation result of the acquired cetuximab-resistant EGFR mutations after cetuximab treatment, Related to Figure 3.**

| Mutation | Patient tumors      | Cell lines          | Reported effect on binding | Experimental binding | Calculated $\Delta\Delta G$ (Rosetta energy unit) |                   |
|----------|---------------------|---------------------|----------------------------|----------------------|---------------------------------------------------|-------------------|
|          |                     |                     |                            |                      | RosettaScripts                                    | InterfaceAnalyzer |
| S492R    | Resistant<br>(1, 2) | Resistant<br>(1, 2) | No binding<br>(1)          | No binding           | 132.1                                             | 150.2             |
| G465R    | Resistant<br>(3)    | Resistant<br>(1)    | No binding<br>(1,4)        | No binding           | 258.8                                             | 282.3             |

Supplementary Table 2. The  $\Delta\Delta G$  values for Cluster 1 of EGFR<sup>S492R/</sup>  
Cetuximab<sup>Mut</sup>, Related to Figure 3.

| Residue | A        | C        | D        | E        | F        | G        | H        | I        | K        | L        | M        | N        | P        | Q        | R        | S        | T        | V        | W        | Y        |
|---------|----------|----------|----------|----------|----------|----------|----------|----------|----------|----------|----------|----------|----------|----------|----------|----------|----------|----------|----------|----------|
| VL-D1   | -9.422   | -9.491   | NaN      | -9.269   | -30.241  | -9.635   | -9.359   | -9.172   | -9.372   | -9.375   | -9.365   | -10.956  | -8.388   | -9.196   | -9.357   | -9.308   | -9.122   | -9.175   | -9.398   | -9.425   |
| VL-S26  | -13.598  | -13.573  | -13.575  | -13.628  | -13.573  | -13.589  | -13.587  | -13.602  | -13.579  | -13.611  | -13.57   | -13.579  | -13.796  | -13.588  | -13.577  | NaN      | -13.645  | -13.594  | -13.58   | -13.589  |
| VL-Q27  | -10.488  | -10.164  | -7.73    | -12.011  | -8.468   | -10.018  | -7.929   | -9.271   | -6.026   | -9.866   | -11.181  | -8.272   | -7.564   | NaN      | -6.638   | -9.937   | -10.416  | -11.448  | -6.049   | -8.405   |
| VL-S28  | -12.815  | -12.777  | -12.511  | -11.004  | -12.342  | -12.208  | -12.732  | -12.443  | -12.2    | -12.258  | -12.185  | -13.003  | -7.397   | -12.687  | -12.441  | NaN      | -33.343  | -11.155  | -12.055  | -12.076  |
| VL-T31  | -11.487  | -11.487  | -11.977  | -11.502  | -11.494  | -11.499  | -11.499  | -11.369  | -11.498  | -11.498  | -11.498  | -11.501  | -11.748  | -11.5    | -11.500  | -11.457  | NaN      | -11.471  | -11.498  | -11.27   |
| VL-N32  | -181.404 | -182.122 | -179.341 | -182.346 | -183.697 | -180.789 | -181.981 | -183.285 | -178.773 | -180.292 | -181.257 | NaN      | -178.634 | -181.148 | -178.969 | -181.149 | -181.84  | -182.709 | -177.533 | -183.603 |
| VL-H34  | -177.962 | -177.953 | -177.988 | -178.15  | -183.973 | -177.72  | NaN      | -177.984 | -177.723 | -183.924 | -183.941 | -177.98  | -178.487 | -178.034 | -183.606 | -177.982 | -177.97  | -177.71  | -184.703 | -184.063 |
| VL-E53  | -8.702   | -8.701   | -8.923   | NaN      | -7.553   | -8.726   | -8.012   | -8.493   | -7.805   | -8.03    | -8.143   | -7.721   | -8.742   | -10.411  | -7.457   | -8.722   | -8.56    | -7.712   | -7.537   | -7.537   |
| VL-N91  | -186.283 | -185.734 | -186.058 | -209.654 | -182.114 | -223.29  | -184.756 | -187.948 | -187.023 | -183.107 | -186.904 | NaN      | -185.65  | -186.09  | -176.372 | -185.978 | -185.177 | -186.756 | -186.893 | -184.1   |
| VL-N92  | -42.78   | -19.402  | -17.514  | -15.919  | -16.793  | -192.795 | -19.208  | -3.769   | -30.601  | 157.943  | -21.761  | NaN      | -21.68   | -17.540  | -17.1    | -19.815  | -18.045  | -17.445  | -14.306  | -17.572  |
| VL-N93  | -20.332  | -20.966  | -20.586  | -14.009  | -2.785   | -20.031  | -10.058  | -1.65    | 67.611   | 4.023    | 7.444    | NaN      | -6.124   | -11.331  | -4.18    | -19.555  | -14.587  | 7.277    | 72.32    | 7.017    |
| VL-W94  | -201.483 | -42.609  | -36.996  | -42.408  | -24.822  | -27.591  | -18.588  | 0.025    | -27.969  | -1.909   | -36.067  | 95.432   | -40.85   | -31.752  | -208.848 | -40.648  | -35.676  | NaN      | -26.54   | -21.988  |
| VL-P95  | -23.966  | -24.286  | -26.932  | -22.301  | -19.52   | -188.141 | -21.682  | -47.498  | 17.015   | 29.354   | -23.158  | -25.769  | NaN      | -22.876  | -37.48   | -24.075  | -25.152  | -26.513  | -22.976  | -21.988  |
| VL-T96  | -196.444 | -221.641 | -192.873 | -179.586 | -194.4   | -194.957 | -192.218 | -186.277 | -186.277 | -190.822 | -190.567 | -188.722 | -183.141 | -171.581 | -174.083 | -197.437 | NaN      | -182.967 | -25.473  | -195.648 |
| VH-N31  | -12.283  | -12.231  | -12.086  | -12.238  | -12.345  | -12.152  | -12.189  | -11.332  | -12.219  | -12.457  | -12.665  | NaN      | -12.176  | -12.354  | -12.899  | -12.17   | -12.188  | -11.157  | -12.643  | -12.446  |
| VH-H35  | -176.35  | -176.641 | -177.475 | -175.253 | -178.042 | -178.857 | NaN      | -176.099 | -176.052 | -177.773 | -176.604 | -186.098 | -176.683 | -176.268 | -175.024 | -176.268 | -176.716 | -176.086 | -183.274 | -176.37  |
| VH-W47  | -186.937 | -228.075 | -184.985 | -184.797 | -220.285 | -187.328 | -222.308 | -210.488 | -193.445 | -217.920 | -184.385 | -185.3   | -184.743 | -186.858 | -185.633 | -186.714 | -187.153 | -218.071 | NaN      | -227.27  |
| VH-Q48  | -18.471  | -19.212  | -19.231  | -19.656  | -19.968  | NaN      | -19.157  | -19.26   | -19.353  | -19.471  | -19.615  | -19.216  | -18.964  | -19.378  | -19.964  | -19.292  | -19.252  | -19.48   | -20.044  | -19.929  |
| VH-Y50  | -180.546 | -180.367 | -183.381 | -184.205 | -184.539 | -180.707 | -184.058 | -182.555 | -182.55  | -181.586 | -185.638 | -180.617 | -212.727 | -183.852 | -181.319 | -184.002 | -178.517 | NaN      | -182.813 | -184.029 |
| VH-W52  | -8.722   | -10.277  | -8.758   | -20.555  | -10.226  | -6.688   | -11.336  | -10.858  | -8.072   | -9.211   | -12.421  | -31.775  | -10.294  | -11.61   | -8.822   | -8.747   | -10.257  | -10.898  | NaN      | -9.516   |
| VH-S53  | -13.583  | -12.815  | -13.98   | -13.782  | 2.768    | -13.038  | 10.299   | -11.222  | -0.307   | -9.889   | -21.403  | -11.133  | -14.056  | -12.57   | -12.382  | NaN      | -13.423  | -13.242  | 13.648   | -8.309   |
| VH-G54  | -10.883  | -3.77    | 3.342    | 12.358   | 27.597   | NaN      | 42.346   | 98.555   | 130.431  | 603.942  | 30.314   | 13.427   | -1.71    | 7.903    | 80.31    | -9.587   | 47.108   | 82.412   | 136.744  | 21.92    |
| VH-C55  | -12.644  | -12.387  | -13.354  | -12.557  | -13.958  | NaN      | -12.584  | -33.341  | -12.141  | -33.829  | -12.326  | -12.157  | 74.082   | -13.071  | -12.238  | -12.145  | -12.387  | -12.719  | -13.066  | -13.862  |
| VH-N65  | -11.537  | -7.093   | -9.139   | -4.705   | 36.196   | -10.661  | -4.829   | -9.606   | -2.681   | 14.116   | -9.394   | NaN      | -11.333  | -8.324   | -2.746   | -10.978  | -5.356   | -6.648   | -10.362  | -9.839   |
| VH-T57  | -12.084  | -12.069  | -11.513  | -12.092  | -11.986  | -32.807  | -12.108  | -12.169  | -10.939  | -11.997  | -12.11   | -11.791  | -10.974  | -11.882  | -12.018  | -12.053  | NaN      | -12.06   | -12.291  | -12.015  |
| VH-D58  | -24.144  | -23.389  | NaN      | -21.461  | -76.383  | -25.759  | -15.781  | -3.549   | -18.747  | -25.236  | -22.134  | -23.285  | -12.82   | -21.449  | -19.617  | -24.337  | -18.515  | -14.409  | -185.829 | -48.279  |
| VH-Y59  | -18.767  | -18.614  | -18.712  | -18.626  | -18.681  | -18.818  | -18.524  | -18.554  | -18.634  | -18.484  | -18.623  | -18.662  | -20.886  | -18.836  | -18.471  | -18.605  | -18.515  | -18.54   | -18.641  | NaN      |
| VH-N80  | -17.343  | -18.68   | -20.927  | -20.016  | -19.04   | -23.535  | -24.584  | -21.059  | -20.341  | -21.613  | -18.354  | NaN      | -20.324  | -20.07   | -19.877  | -18.438  | -16.327  | 48.615   | -18.529  | -18.624  |
| VH-T61  | -19.316  | -19.481  | -15.134  | -19.208  | -19.278  | -19.052  | -19.342  | -15.9    | -19.094  | -19.683  | -19.503  | -19.341  | -21.739  | -19.335  | -19.588  | -19.181  | NaN      | -19.46   | -19.379  | -19.307  |
| VH-N73  | -11.987  | -12.008  | -12.098  | -11.988  | -12.008  | -12.008  | -12.008  | -12.004  | -11.785  | -11.984  | -12.015  | NaN      | -11.969  | -12.073  | -11.968  | -11.968  | -11.998  | -11.998  | -12.008  | -11.998  |
| VH-T00  | -178.072 | -178.073 | -174.809 | -178.111 | -178.05  | -178.198 | -176.038 | -176.381 | -176.143 | -176.189 | -175.836 | -175.536 | -197.343 | -175.536 | -175.016 | -175.052 | NaN      | -176.149 | -177     | -176.036 |
| VH-Y101 | -10.16   | -10.688  | -27.642  | -8.596   | -12.152  | -174.496 | -31.18   | -9.027   | -7.06    | -10.951  | -10.765  | -6.82    | -8.825   | -9.708   | -6.82    | -8.939   | -8.077   | -12.149  | NaN      | NaN      |
| VH-Y102 | -178.057 | -178.768 | -177.252 | -174.762 | -202.616 | -174.039 | -177.114 | -193.308 | -172.747 | -186.303 | -176.765 | -177.507 | -174.464 | -175.182 | -192.57  | -173.976 | -173.512 | -174.441 | -177.751 | NaN      |
| VH-D103 | -178.765 | -179.814 | NaN      | -176.708 | -173.117 | -179.958 | -179.242 | -181.105 | -170.904 | -179.087 | -188.395 | -200.015 | -180.284 | -177.405 | -175.98  | -178.47  | -200.213 | -179.719 | -178.264 | -170.047 |
| VH-Y104 | -230.031 | -224.324 | -222.872 | -222.855 | -189.223 | -232.805 | -202.523 | -224.735 | -208.319 | -215.638 | -234.074 | -222.47  | -231.479 | -223.754 | -204.328 | -225.106 | -223.651 | -224.628 | -180.489 | NaN      |

Supplementary Table 3. The  $\Delta\Delta G$  values for Cluster 2 of EGFR<sup>S492R/</sup>  
Cetuximab<sup>Mut</sup>, Related to Figure 3.

| Residue | A        | C        | D        | E        | F        | G        | H        | I        | L        | K        | L        | M        | N        | P        | Q        | R        | S        | T        | V        | W        | Y |
|---------|----------|----------|----------|----------|----------|----------|----------|----------|----------|----------|----------|----------|----------|----------|----------|----------|----------|----------|----------|----------|---|
| VL-D1   | 47.148   | 47.206   | NaN      | 47.228   | 47.02    | 46.959   | 47.188   | 47.54    | 46.801   | 47.347   | 47.203   | 45.586   | 48.561   | 47.565   | 47.245   | 47.532   | 47.537   | 47.537   | 46.104   | 47.083   |   |
| VL-I2   | 43.764   | 43.816   | 42.087   | 44.833   | 47.053   | 42.809   | 48.176   | NaN      | 51.354   | 45.467   | 45.489   | 43.519   | 43.481   | 44.152   | 52.094   | 43.863   | 43.891   | 43.45    | 46.739   | 47.916   |   |
| VL-O27  | 45.083   | 45.023   | 45.286   | 42.848   | 46.091   | 45.256   | 45.554   | 44.776   | 47.183   | 48.038   | 42.481   | 45.574   | 45.196   | NaN      | 48.562   | 45.216   | 45.098   | 44.892   | 45.307   | 45.769   |   |
| VL-S28  | 43.721   | 43.707   | 43.652   | 44.091   | 43.731   | 43.694   | 43.689   | 43.485   | 43.804   | 43.599   | 43.712   | 43.744   | 43.744   | 43.744   | 42.653   | 43.494   | 43.364   | 43.759   | 43.759   | 43.74    |   |
| VL-N32  | -138.857 | -136.402 | -137.546 | -138.063 | -137.594 | -138.463 | -138.114 | -134.548 | -137.155 | -137.728 | -141.778 | NaN      | -126.896 | -138.866 | -138.702 | -140.332 | -142.768 | -141.549 | -139.069 | -141.549 |   |
| VL-H34  | -130.478 | -130.517 | -130.526 | -130.824 | -128.552 | -130.586 | NaN      | -129.978 | -128.118 | -131.634 | -130.204 | -128.813 | -130.837 | -130.298 | -130.473 | -130.493 | -130.091 | -129.594 | -129.557 | -129.557 |   |
| VL-K49  | -131.334 | -131.652 | -132.165 | -128.946 | -133.275 | -131.614 | -133.814 | NaN      | -132.2   | -131.303 | -131.303 | -133.257 | -126.381 | -130.259 | -132.4   | -132.345 | -126.486 | -131.406 | -131.406 | -131.406 |   |
| VL-Y50  | 40.126   | 39.55    | 39.317   | 40.176   | 41.787   | 40.84    | 42.131   | 39.888   | 43.772   | 39.659   | 38.951   | 41.446   | 40.104   | 40.461   | 43.116   | 40.172   | 40.201   | 39.679   | 41.191   | NaN      |   |
| VL-E53  | 44.301   | 43.999   | 43.371   | NaN      | 43.682   | 44.179   | 44.206   | 46.62    | 45.359   | 43.062   | 43.885   | 44.155   | 44.489   | 43.607   | 43.29    | 44.304   | 44.111   | 44.067   | 41.105   | 44.423   |   |
| VL-N91  | -111.457 | -111.086 | -111.039 | -122.758 | -127.065 | -164.898 | -112.235 | -112.638 | -112.186 | -131.671 | -102.681 | NaN      | -124.868 | -109.205 | -94.444  | -111.449 | -110.586 | -111.483 | -33.584  | -105.582 |   |
| VL-N92  | 4.047    | 3.861    | 4.432    | 4.781    | 3.003    | -130.786 | 4.338    | -146.631 | 6.101    | 173.856  | 2.18     | NaN      | -145.96  | 3.724    | 4.799    | 3.028    | 3.612    | 3.973    | 7.673    | 3.096    |   |
| VL-N93  | 4.713    | 3.937    | 3.17     | 3.48     | 9.274    | 5.091    | 5.92     | 3.952    | 7.512    | 3.95     | 2.438    | NaN      | 9.088    | 5.281    | 9.202    | 5.119    | 4.654    | 4.048    | 16.63    | 11.058   |   |
| VL-W94  | -25.141  | -25.618  | -23.321  | -21.327  | -151.203 | -23.827  | -25.537  | -90.71   | -1.563   | 6.471    | 3.756    | -153.481 | 57.516   | -20.424  | -17.585  | -23.436  | -22.321  | -25.49   | NaN      | -21.23   |   |
| VL-P95  | -147.169 | -148.034 | -149.072 | -147.751 | -146.514 | -137.906 | -144.826 | -148.778 | -134.96  | -35.761  | -66.036  | -146.313 | NaN      | -143.346 | -138.203 | -146.281 | -147.226 | -147.693 | -144.578 | -145.55  |   |
| VL-T98  | -152.752 | -141.004 | -150.397 | -149.313 | -138.09  | -138.59  | -142.572 | -144.74  | -146.517 | -146.778 | -132.065 | -145.634 | -146.475 | -145.313 | -149.772 | -146.246 | NaN      | -111.49  | -148.323 | -145.363 |   |
| VH-N31  | 43.402   | 43.445   | 43.263   | 42.28    | 43.411   | 43.459   | 43.292   | 43.915   | 43.463   | 43.267   | 43.073   | NaN      | 43.452   | 43.053   | 43.025   | 43.417   | 43.441   | 44.028   | 43.138   | 43.386   |   |
| VH-H35  | -126.957 | -130.051 | -130.496 | -128.895 | -127.669 | -128.595 | NaN      | -129.884 | -129.912 | -126.183 | -130.461 | -130.641 | -129.353 | -129.764 | -129.897 | -129.055 | -128.069 | -130.843 | -126.459 | -128.537 |   |
| VH-G49  | -134.818 | -128.399 | -133.099 | -125.118 | -133.438 | -147.702 | -118.128 | -132.983 | -124.678 | -128.763 | -126.778 | -132.507 | -122.653 | -124.914 | -141.191 | -129.107 | -125.45  | -125.577 | NaN      | -117.402 |   |
| VH-Y50  | -126.013 | -125.665 | -119.824 | -126.965 | -128.54  | -110.763 | -125.358 | -117.88  | -125.135 | -122.314 | -122.912 | -123.068 | -121.581 | -116.193 | -127.737 | -126.936 | -123.434 | 43.191   | 41.475   | 41.862   |   |
| VH-W52  | 44.691   | 44.214   | 44.827   | 45.097   | 44.306   | 44.809   | 42.796   | 44       | 47.321   | 45.881   | 42.804   | 44.084   | 44.695   | 42.475   | 44.708   | 44.484   | 43.938   | 43.654   | NaN      | 44.817   |   |
| VH-S53  | 40.985   | 40.967   | 41.524   | 40.857   | 48.829   | 41.091   | 48.996   | 43.112   | 58.894   | 51.56    | 53.597   | 46.134   | 40.879   | 40.828   | 41.656   | NaN      | 40.709   | 42.346   | 47.183   | 55.932   |   |
| VH-G54  | 48.654   | 59.871   | 67.439   | 80.908   | 86.46    | NaN      | 79.698   | 148.756  | 171.059  | 516.842  | 102.055  | 69.57    | 55.763   | 75.352   | 151.704  | 48.064   | 89.991   | 139.793  | 140.416  | 89.267   |   |
| VH-G55  | 40.795   | 41.009   | 39.516   | 40.888   | 40.241   | NaN      | 40.965   | 40.787   | 41.034   | 40.482   | 41.039   | 41.099   | 63.465   | 40.634   | 41.089   | 41.369   | 40.905   | 40.752   | 38.203   | 40.171   |   |
| VH-N56  | 42.936   | 45.848   | 46.655   | 51       | 104.641  | 43.968   | 46.2     | 46.746   | 52.871   | 76.626   | 44.925   | NaN      | 42.492   | 50.216   | 53.401   | 43.641   | 49.108   | 47.665   | 44.445   | 45.425   |   |
| VH-T57  | 42.899   | 42.883   | 43.456   | 42.983   | 41.83    | 42.885   | 43.151   | 42.739   | 42.967   | 42.911   | 42.934   | 43.068   | 45.929   | 42.935   | 41.853   | 43.107   | NaN      | 42.818   | 42.442   | 42.848   |   |
| VH-D58  | -146.196 | -25.533  | NaN      | -142.82  | -131.13  | -147.623 | -63.024  | -140.415 | -141.16  | -143.204 | -26.662  | -147.359 | 13.645   | -143.73  | -140.265 | -146.665 | -20.288  | -139.447 | -134.201 | -96.309  |   |
| VH-Y59  | 42.036   | 42.051   | 42.204   | 42.123   | 42.081   | 41.923   | 42.127   | 42.08    | 42.019   | 42.023   | 41.998   | 41.973   | 42.343   | 41.958   | 40.878   | 42.151   | 42.14    | 42.081   | 42.071   | NaN      |   |
| VH-N60  | 43.396   | 40.380   | 40.459   | 41.247   | 40.772   | 40.539   | 43.31    | 78.44    | 43.34    | 39.897   | 40.495   | NaN      | 81.05    | 41.409   | 41.435   | 43.321   | 51.062   | 78.286   | 43.211   | 43.331   |   |
| VH-T100 | -128.627 | -128.435 | -127.815 | -128.866 | -128.555 | -128.301 | -128.145 | -130.028 | -128.995 | -128.985 | -128.161 | -128.618 | -127.112 | -129.631 | -130.633 | -128.276 | NaN      | -128.322 | -130.075 | -129.493 |   |
| VH-Y101 | 45.128   | 44.421   | 48.289   | 46.638   | 42.9     | -128.057 | 44.652   | 46.961   | 48.212   | 54.346   | 44.795   | 46.16    | 44.969   | 45.713   | 48.966   | 46.095   | 48.644   | 47.542   | 53.153   | NaN      |   |
| VH-Y102 | -138.534 | -138.165 | -138.334 | -138.779 | -143.644 | -137.292 | -140.613 | -110.34  | -134.404 | -124.538 | -137.61  | -139.921 | -117.216 | -137.084 | -130.158 | -137.985 | -130.304 | -132.02  | -134.801 | NaN      |   |
| VH-D103 | -132.242 | -128.227 | NaN      | -135.366 | -97.803  | -129.59  | -128.178 | -139.85  | -119.538 | -114.001 | -137.713 | -143.061 | -136.862 | -123.834 | -128.273 | -126.207 | -132.96  | -126.947 | -116.877 | -89.441  |   |
| VH-Y104 | -171.437 | -167.738 | -167.975 | -159.597 | -157.337 | -171.116 | -148.989 | -167.434 | -151.613 | -159.15  | -158.16  | -165.144 | -167.773 | -159.806 | -137.387 | -168.874 | -168.159 | -170.884 | -93.743  | NaN      |   |
| VH-E105 | -131.001 | -131.002 | -130.76  | NaN      | -128.488 | -130.991 | -129.154 | -130.888 | -131.684 | -131.606 | -123.229 | -131.03  | -130.779 | -130.954 | -127.684 | -131.011 | -131.03  | -130.966 | -128.355 | -128.067 |   |

Supplementary Table 4. The  $\Delta\Delta G$  values for Cluster 3 of EGFR<sup>S492R</sup>/Cetuximab<sup>Mut</sup>, Related to Figure 3.

| Residue | A        | C        | D        | E        | F        | G        | H        | I        | K        | L        | M        | N        | P        | Q        | R        | S        | T        | V        | W        | Y        |
|---------|----------|----------|----------|----------|----------|----------|----------|----------|----------|----------|----------|----------|----------|----------|----------|----------|----------|----------|----------|----------|
| VL-D1   | -73.614  | -74.037  | NaN      | -74.484  | -73.616  | -73.792  | -71.773  | -73.931  | -73.678  | -73.721  | -73.74   | -75.02   | -73.548  | -73.695  | -73.573  | -73.588  | -73.796  | -73.926  | -73.724  | -73.593  |
| VL-S26  | -71.195  | -71.167  | -71.154  | -71.229  | -71.149  | -71.222  | -71.192  | -71.157  | -71.192  | -71.147  | -71.146  | -71.204  | -71.22   | -71.153  | -71.145  | NaN      | -71.16   | -71.126  | -71.153  | -71.156  |
| VL-Q27  | -68.029  | -68.488  | -66.882  | -70.411  | -67.756  | -67.49   | -66.472  | -69.353  | -64.376  | -67.646  | -69.386  | -66.757  | -65.498  | NaN      | -66.418  | -67.467  | -68.332  | -60.74   | -67.135  | -67.449  |
| VL-S28  | -71.119  | -71.33   | -70.9    | -69.694  | -70.607  | -70.725  | -71.487  | -69.495  | -70.663  | -70.639  | -70.735  | -71.357  | -66.208  | -70.824  | -70.916  | NaN      | -71.507  | -69.004  | -70.487  | -70.51   |
| VL-T31  | -70.835  | -70.607  | -70.889  | -70.609  | -70.567  | -70.813  | -70.611  | -70.437  | -70.611  | -70.609  | -70.611  | -70.35   | -70.706  | -70.61   | -70.608  | -70.495  | NaN      | -70.543  | -70.61   | -69.86   |
| VL-N32  | -121.079 | -121.943 | -118.066 | -117.994 | -120.746 | -120.431 | -120.454 | -122.532 | -119.67  | -116.991 | -120.053 | NaN      | -121.927 | -114.487 | -117.266 | -120.738 | -120.769 | -121.977 | -113.328 | -121.813 |
| VL-H34  | -114.221 | -114.21  | -114.165 | -114.03  | -114.25  | -113.445 | NaN      | -114.115 | -113.00  | -114.268 | -114.154 | -114.251 | -115.116 | -114.291 | -114.545 | -114.264 | -114.198 | -114.078 | -114.942 | -114.292 |
| VL-Y50  | -69.657  | -69.727  | -72.919  | -69.517  | -70.902  | -69.981  | -69.85   | -69.568  | -67.954  | -69.542  | -70.479  | -69.254  | -69.282  | -70.5    | -67.46   | -69.436  | -69.533  | -69.949  | -70.736  | NaN      |
| VL-N91  | -128.244 | -67.863  | -67.806  | NaN      | -66.689  | -67.908  | -67.635  | -67.764  | -67.196  | -67.459  | -67.634  | -66.399  | -67.506  | -67.858  | -67.851  | -67.989  | -67.87   | -67.807  | -67.369  | -67.151  |
| VL-N92  | -83.712  | -83.752  | -82.016  | -81.233  | -82.244  | -123.722 | -165.413 | -130.782 | -128.415 | -131.251 | -129.382 | NaN      | -127.784 | -128.467 | -124.074 | -127.84  | -129.65  | -130.11  | 5.305    | -123.576 |
| VL-N93  | -84.597  | -85.111  | -84.95   | -81.323  | -74.966  | -84.776  | -78.087  | -86.946  | -12.762  | -63.149  | -88.641  | NaN      | -78.848  | -79.284  | -60.291  | -83.963  | -76.986  | -66.752  | -45.111  | -73.204  |
| VL-W94  | -89.273  | -90.003  | -85.791  | -83.563  | -84.63   | -88.373  | -83.842  | -26.943  | -42.249  | -66.069  | -66.731  | -65.439  | 195.307  | -83.076  | -64.159  | -86.608  | -83.17   | -75.79   | NaN      | -85.686  |
| VL-P95  | -86.408  | -85.954  | -85.613  | -85.288  | -83.252  | -132.759 | -85.358  | -84.941  | -36.657  | -86.041  | -85.7    | -86.28   | NaN      | -85.917  | -44.286  | -86.158  | -83.68   | -85.358  | -85.537  | -85.162  |
| VL-T96  | -137.684 | -137.751 | -136.629 | -129.642 | -139.238 | -136.866 | -136.165 | -133.938 | -117.057 | -122.689 | -129.731 | -134.918 | -113.207 | -125.051 | -128.346 | -137.239 | NaN      | -136.288 | -139.338 | -140.187 |
| VH-I30  | -70.608  | -70.651  | -70.608  | -70.651  | -70.652  | -70.651  | -70.608  | -70.651  | -70.608  | -70.608  | -70.608  | -70.651  | -70.647  | -70.608  | -70.608  | -70.608  | -70.652  | -70.651  | -70.652  | -70.652  |
| VH-N31  | -70.641  | -70.559  | -70.741  | -70.631  | -70.522  | -70.57   | -70.681  | -70.756  | -70.553  | -70.572  | -70.715  | NaN      | -70.501  | -70.603  | -70.444  | -70.477  | -70.526  | -70.754  | -70.829  | -70.59   |
| VH-W47  | -151.683 | -152.206 | -152.719 | -151.931 | -151.233 | -151.644 | -151.002 | -152.449 | -149.842 | -151.684 | -151.125 | -151.716 | -151.367 | -151.233 | -145.907 | -151.734 | -151.937 | -152.55  | NaN      | -151.324 |
| VH-V50  | -133.705 | -133.67  | -131.169 | -134.783 | -29.928  | -135.354 | -134.357 | -136.079 | -116.753 | -133.59  | -133.084 | -133.26  | -118.943 | -128.797 | -127.337 | -133.059 | -136.191 | NaN      | 23.735   | -29.389  |
| VH-W52  | -66.723  | -68.155  | -65.963  | -66.421  | -69.683  | -66.096  | -70.779  | -65.283  | -65.707  | -68.045  | -68.651  | -67.884  | -68.329  | -68.064  | -67.986  | -66.579  | -67.507  | -65.432  | NaN      | -71.038  |
| VH-S53  | -70.758  | -70.353  | -70.68   | -67.662  | -23.496  | -70.317  | -49.997  | -61.698  | -49.11   | -59.567  | -48.893  | -65.571  | -69.635  | -49.552  | -27.94   | NaN      | -67.196  | -63.046  | -27.829  | -30.985  |
| VH-G55  | -70.953  | -71.088  | -71.439  | -71.544  | -71.825  | NaN      | -71.36   | -71.023  | -70.905  | -72.031  | -70.972  | -71.172  | -64.637  | -70.91   | -70.22   | -71.066  | -70.853  | -71.046  | -70.261  | -71.846  |
| VH-N56  | -71.968  | -67.195  | -64.838  | -53.231  | 20.285   | -70.537  | -46.737  | -66.965  | -48.142  | -15.064  | -45.371  | NaN      | -68.864  | -40.501  | -51.825  | -72.266  | -50.833  | -63.147  | -61.70   | -56.108  |
| VH-T57  | -70.958  | -70.993  | -70.062  | -71.103  | -70.653  | -71.143  | -70.362  | -70.318  | -70.897  | -71.099  | -71.052  | -70.642  | -69.93   | -71.044  | -70.985  | -70.96   | -70.96   | -71.02   | -70.902  | -72.259  |
| VH-D58  | -99.119  | -99.539  | NaN      | -81.682  | -20.222  | -104.274 | -68.297  | -78.681  | -80.431  | -56.684  | -85.883  | -81.888  | -93.138  | -82.215  | -71.509  | -97.048  | -90.15   | -89.189  | 330.214  | 17.652   |
| VH-Y50  | -70.648  | -70.624  | -70.378  | -70.57   | -70.541  | -76.187  | -70.463  | -70.506  | -70.575  | -70.629  | -70.632  | -70.528  | -74.433  | -70.943  | -70.541  | -70.433  | -70.451  | -70.521  | -70.467  | NaN      |
| VH-N60  | -77.884  | -76.604  | -76.37   | -76.722  | -76.728  | -76.532  | -77.782  | -76.955  | -77.413  | -77.066  | -76.651  | NaN      | -77.73   | -76.737  | -77.878  | -76.366  | -74.354  | -55.649  | -77.653  | -77.234  |
| VH-T61  | -78.307  | -76.622  | -78.171  | -78.353  | -78.321  | -78.244  | -78.184  | -74.175  | -76.401  | -78.547  | -77.694  | -78.291  | -76.91   | -78.216  | -78.286  | -77.694  | NaN      | -76.984  | -78.425  | -78.425  |
| VH-T64  | -70.864  | -70.57   | -70.938  | -71.647  | -70.283  | -70.709  | -70.662  | -70.203  | -70.248  | -70.367  | -70.951  | -70.595  | -70.83   | -71.088  | -70.657  | -70.663  | NaN      | -70.551  | -70.488  | -70.254  |
| VH-T100 | -114.763 | -114.671 | -112.456 | -115.683 | -115.193 | -114.573 | -114.76  | -114.996 | -114.693 | -115.022 | -114.84  | -114.487 | -114.172 | -114.393 | -114.327 | -114.733 | NaN      | -114.713 | -115.857 | -115.119 |
| VH-Y101 | -68.347  | -68.888  | -66.454  | -63.567  | -70.249  | -111.213 | -69.382  | -66.942  | -66.194  | -47.473  | -69.149  | -68.221  | -69.004  | -65.884  | -66.405  | -66.957  | -67.76   | -64.518  | -68.604  | NaN      |
| VH-Y102 | -116.474 | -116.87  | -116.465 | -117.696 | -124.175 | -116.863 | -120.228 | -119.906 | -114.758 | -119.368 | -119.469 | -118.115 | -115.328 | -118.643 | -115.441 | -117.101 | -115.913 | -120.539 | -86.916  | NaN      |
| VH-D103 | -122.063 | -121.469 | NaN      | -120.058 | -99.913  | -121.091 | -116.262 | -122.767 | -118.111 | -120.876 | -123.947 | -122.222 | -123.763 | -121.967 | -120.183 | -121.51  | -121.88  | -121.983 | -118.521 | -101.597 |
| VH-Y104 | -166.791 | -165.236 | -166.583 | -166.652 | -138.001 | -170.115 | -144.4   | -168.901 | -147.694 | -145.452 | -163.778 | -165.321 | -169.464 | -168.43  | -132.462 | -168.059 | -160.158 | -169.697 | -110.333 | NaN      |



Supplementary Table 5. The  $\Delta\Delta G$  values for Cluster 1 of EGFR<sup>G465R</sup>/Cetuximab<sup>Mut</sup>, Related to Figure 3.

| Residue | A        | C        | D        | E        | F        | G        | H        | I        | K        | L        | M        | N        | P        | Q        | R        | S        | T        | V        | W        | Y        |
|---------|----------|----------|----------|----------|----------|----------|----------|----------|----------|----------|----------|----------|----------|----------|----------|----------|----------|----------|----------|----------|
| VL-D1   | 2.19     | 40.365   | NaN      | 2.491    | 40.489   | 30.308   | 75.462   | 2.527    | 40.41    | 30.509   | 3.762    | 29.868   | 2.228    | 30.557   | 30.557   | 68.478   | 2.535    | 30.554   | 31.118   | 68.477   |
| VL-I2   | 27.894   | 28.576   | 26.892   | 26.331   | 34.635   | 27.884   | 31.207   | NaN      | 38.767   | 33.965   | 27.069   | 27.87    | 28.924   | 30.551   | 41.379   | 27.974   | 28.037   | 28.135   | 34.093   | 33.845   |
| VL-S26  | 27.333   | 27.338   | 28.582   | 27.326   | 27.332   | 27.681   | 28.58    | 27.143   | 27.333   | 27.335   | 27.107   | 27.105   | 27.328   | 28.681   | 27.686   | NaN      | 27.188   | 27.331   | 28.275   | 29.276   |
| VL-Q27  | 28.597   | 27.777   | 29.335   | 25.275   | 29.67    | 31.416   | 30.569   | 28.2     | 33.808   | 28.73    | 28.583   | 30.851   | 31.148   | NaN      | 31.060   | 29.017   | 29.690   | 29.371   | 29.300   | 29.829   |
| VL-S28  | 37.09    | 27.32    | 27.32    | 38.791   | 27.473   | 75.219   | 27.524   | 29.237   | 75.12    | 37.301   | 28.958   | 37.306   | 75.254   | -9.909   | 75.174   | NaN      | -10.214  | 28.678   | 28.585   | 44.988   |
| VL-N32  | -46.518  | -7.678   | -43.263  | -6.445   | 1.457    | 43.486   | 48.671   | 40.969   | -5.743   | 43.236   | -9.196   | NaN      | -5.115   | -47.531  | -7.23    | 40.631   | 2.612    | -11.037  | 39.076   | 38.307   |
| VL-I34  | 41.101   | 39.705   | 57.006   | 41.41    | -7.615   | 50.416   | NaN      | -5.384   | -41.794  | 39.819   | -43.037  | -42.447  | 41.092   | -38.717  | 5.616    | 41.542   | -6.816   | 45.118   | -4.732   | -7.338   |
| VL-Y50  | 84.006   | -4.033   | 62.165   | 24.652   | -3.13    | 34.228   | 26.741   | 24.841   | 8.72     | 34.596   | 41.265   | 62.717   | -5.503   | 24.235   | 26.807   | 62.171   | -3.745   | 24.147   | 19.27    | NaN      |
| VL-E53  | 43.98    | 0.716    | 65.01    | NaN      | 44.368   | 36.976   | 27.335   | 44.222   | 28.036   | 37.008   | 27.502   | 27.495   | 89.569   | 37.025   | 65.759   | 27.128   | 1.288    | 65.075   | 27.43    | 27.225   |
| VL-N91  | 24.078   | -25.101  | 15.903   | 14.121   | 16.928   | 50.082   | 14.86    | 22.913   | 66.175   | 11.718   | 62.529   | NaN      | 16.594   | 14.061   | 70.377   | 14.636   | -25.052  | -24.301  | 63.285   | 16.514   |
| VL-N92  | 26.813   | 24.805   | 78.266   | 26.302   | -8.602   | 26.705   | 75.806   | 82.828   | 74.825   | 238.172  | -14.302  | NaN      | 28.731   | -11.767  | 27.370   | 27.760   | -12.996  | 27.932   | 29.592   | 27.751   |
| VL-N93  | -6.44    | 25.165   | 24.22    | 27.955   | 31.717   | 28.042   | -7.193   | 31.09    | 38.629   | 79.865   | 27.984   | NaN      | 30.807   | 32.548   | 50.483   | 27.188   | -10.763  | 28.834   | -0.399   | 0.291    |
| VL-W94  | 87.538   | 0.021    | 76.119   | 4.661    | 29.159   | 30.182   | 66.216   | 5.096    | 13.276   | 79.727   | 7.471    | 37.36    | 272.051  | 70.21    | 72.158   | 29.927   | 33.547   | 4.158    | NaN      | 28.454   |
| VL-P95  | 68.257   | 26.006   | -6.743   | 25.508   | 26.898   | 37.372   | 25.794   | -6.431   | 23.105   | 100.528  | -7.178   | 68.066   | NaN      | 25.872   | -5.612   | 25.528   | -4.781   | -6.042   | -3.295   | -6.438   |
| VL-T96  | 10.714   | 9.54     | -25.137  | 59.033   | 59.488   | 18.658   | 68.313   | 18.542   | 51.63    | 19.259   | -20.864  | 7.833    | -24.633  | 12.197   | -24.608  | 8.816    | NaN      | 51.054   | 10.055   | 45.799   |
| VH-N91  | 28.479   | 63.946   | 37.67    | 26.024   | 26.066   | 38.281   | 65.959   | 67.839   | -0.111   | 27.926   | 72.651   | NaN      | 37.82    | 65.855   | 28.164   | 44.874   | 0.226    | 67.576   | 28.721   | 0.228    |
| VH-H95  | 5.25     | 34.763   | -2.352   | -10.489  | 6.642    | -37.486  | NaN      | 63.384   | 45.781   | 46.862   | 3.127    | -2.275   | -3.605   | 31.721   | 11.761   | -30.725  | -7.415   | 29.614   | 38.803   | 16.144   |
| VH-W47  | 32.595   | -3.919   | -4.821   | 0.167    | 12.854   | -3.683   | -3.733   | -3.002   | -28.444  | 33.631   | -6.254   | -33.42   | -33.104  | 7.322    | 32.866   | -33.149  | 2.983    | -5.209   | NaN      | -3.865   |
| VH-V50  | -171.187 | -157.271 | -160.727 | -116.021 | -5.55    | -127.854 | -85.807  | -160.268 | -141.874 | -64.583  | -30.706  | -86.452  | -143.126 | 49.53    | -29.791  | -165.003 | -128.615 | NaN      | -130.457 | -138.676 |
| VH-W52  | -150.892 | -144.066 | -153.414 | -112.932 | -144.483 | -153.305 | -149.939 | -126.204 | -117.976 | -125.965 | -153.204 | -179.323 | -178.692 | -124.738 | -118.596 | -116.146 | -153.517 | -144.825 | NaN      | -76.225  |
| VH-S53  | 10.093   | 9.222    | 4.441    | 29.018   | -13.899  | -34.77   | 2.923    | -35.279  | 1.216    | 36.987   | 38.161   | 5.181    | -35.104  | -5.912   | 38.715   | NaN      | -6.765   | 2.86     | 104.459  | 19.655   |
| VH-G54  | 4.784    | 8.967    | 15.633   | 37.429   | 24.203   | NaN      | 70.563   | 81.866   | 177.263  | 574.252  | 53.393   | 45.314   | 38.303   | 17.083   | 161.523  | -0.079   | 46.207   | 93.23    | 83.208   | 77.786   |
| VH-G55  | 33.485   | -33.745  | 33.140   | 31.45    | -6.597   | NaN      | 31.706   | -2.737   | 35.039   | -4.101   | -3.947   | 7.344    | -29.214  | -35.039  | 31.776   | 34.862   | -30.493  | -33.512  | 39.738   | 5.498    |
| VH-N65  | -72.322  | -21.983  | -95.702  | -91.268  | 118.568  | -25.278  | -91.625  | -50.708  | -51.598  | -49.366  | 75.319   | NaN      | -60.837  | -92.784  | -50.088  | 24.482   | -84.953  | -88.975  | -83.216  | -83.848  |
| VH-I57  | 95.101   | -67.631  | -55.111  | -95.341  | -58.401  | -65.165  | -57.917  | -96.803  | -96.312  | -93.164  | -68.53   | -66.651  | -65.594  | -68.246  | -30.329  | -30.483  | NaN      | -93.341  | -67.892  | -58.74   |
| VH-D65  | -79.038  | -115.596 | NaN      | -78.875  | -81.897  | -88.31   | -46.111  | -121.28  | -76.357  | -89.054  | -118.767 | -77.454  | -115.116 | -81.107  | -76.302  | -88.384  | -79.21   | -87.694  | -46.551  | -56.235  |
| VH-Y59  | 86.317   | 36.278   | 28.53    | 0.204    | 0.549    | 29.481   | 38.08    | 73.237   | -0.066   | 37.907   | 28.101   | 28.895   | 34.621   | 1.339    | 28.95    | 37.714   | 28.077   | -0.027   | 5.671    | NaN      |
| VH-T64  | 26.731   | 65.474   | 28.775   | 37.157   | 0.214    | 38.697   | 37.357   | -0.571   | 37.988   | 1.459    | 27.627   | 67.033   | 27.37    | 27.76    | 28.168   | 28.2     | NaN      | 27.637   | -0.767   | 0.866    |
| VH-I100 | 32.859   | 4.317    | -5.187   | 30.341   | 31.313   | -7.219   | -5.239   | -4.423   | -3.966   | -8.713   | -5.062   | 39.847   | -3.302   | 4.73     | -8.798   | 4.222    | NaN      | -5.808   | -7.395   | -6.973   |
| VH-Y101 | -29.74   | 35.172   | 3.344    | -28.194  | -2.778   | 16.758   | -0.131   | 39.931   | 11.167   | 41.773   | 36.008   | -28.694  | -30.16   | -27.312  | -25.604  | -2.483   | -0.888   | -30.199  | -25.315  | NaN      |
| VH-Y102 | 95.07    | -61.99   | -95.256  | -100.058 | -131.803 | -126.138 | -91.127  | -102.959 | -56.62   | -50.237  | -127.499 | -128.204 | -126.392 | -103.277 | -101.04  | -96.058  | -99.056  | -122.629 | -102.286 | NaN      |
| VH-D103 | -4.349   | 39.644   | NaN      | 0.313    | -23.519  | 34.309   | 5.186    | -7.142   | 2.008    | 6.5      | -29.9    | -5       | 38.665   | -0.923   | 2.516    | -29.524  | -31.774  | 33.767   | -3.034   | -27.777  |
| VH-Y104 | -40.34   | -35.607  | -40.649  | -32.85   | -15.895  | -37.033  | 2.38     | 36.093   | 48.059   | -5.195   | -34.758  | 36.864   | -5.479   | -2.814   | 43.106   | 14.946   | 37.995   | 37.615   | -16.005  | NaN      |
| VH-E105 | -5.622   | -33.195  | -6.727   | NaN      | 0.162    | 32.684   | 34.36    | -4.233   | 33.631   | -2.909   | -34.826  | 33.16    | 33.886   | -4.431   | -30.3    | -33.838  | -4.617   | -34.282  | -31.484  | -2.964   |
| VH-F106 | -29.076  | -29.462  | 0.277    | 6.173    | NaN      | 10.876   | -2.332   | -30.07   | 7.282    | 34.586   | -30.443  | 37.428   | -3.312   | -0.525   | -31.225  | 1.365    | -2.914   | -32.328  | 21.333   | 13.366   |

Supplementary Table 6. The  $\Delta\Delta G$  values for Cluster 2 of EGFR<sup>G465R/</sup>Cetuximab<sup>Mut</sup>, Related to Figure 3.

| Residue | A        | C       | D        | E       | F        | G       | H        | I       | K       | L       | M       | N        | P        | Q       | R       | S        | T        | V       | W        | Y       |
|---------|----------|---------|----------|---------|----------|---------|----------|---------|---------|---------|---------|----------|----------|---------|---------|----------|----------|---------|----------|---------|
| VL-D1   | 2.564    | 2.767   | NaN      | 2.198   | 2.65     | 3.321   | 3.483    | 2.561   | 4.354   | 2.662   | 2.385   | 2.076    | 2.794    | 3.227   | 2.911   | 2.773    | 2.56     | 2.768   | 1.441    | 2.71    |
| VL-I2   | -2.162   | -2.101  | 0.233    | -0.285  | -0.423   | -1.635  | 3.801    | NaN     | 2.233   | -3.539  | 0.751   | -2.334   | -2.293   | 5.584   | 8.087   | -1.778   | -1.78    | -4.852  | -0.378   | 1.459   |
| VL-Q27  | -0.438   | -1.303  | -0.387   | -1.819  | 0.896    | -1.257  | 0.756    | 5.903   | 1.836   | 0.456   | -1.039  | 2.96     | -1.37    | NaN     | 1.671   | -0.934   | -0.549   | 0.308   | 1.71     | 0.812   |
| VL-S28  | -0.732   | -0.844  | -0.705   | -0.011  | -0.711   | -0.882  | -0.787   | -0.817  | -0.77   | -0.758  | -0.653  | -0.754   | -0.776   | -0.528  | -1.028  | NaN      | -0.914   | -1.215  | -0.909   | -0.686  |
| VL-N32  | -35.771  | -36.326 | -36.057  | -35.982 | -38.627  | -34.457 | -33.427  | -37.293 | -33.798 | -36.738 | -37.461 | NaN      | -35.445  | -36.222 | -33.649 | -35.38   | -36.13   | -36.833 | -38.822  | -39.169 |
| VL-H34  | -14.925  | -15.987 | -17.289  | -36.9   | -33.973  | -36.92  | NaN      | -34.88  | -14.302 | -31.478 | -33.799 | -15.655  | -35.114  | -19.916 | -13.405 | -16.355  | -30.727  | -36.852 | -35.608  | -35.082 |
| VL-Y50  | -3.43    | -3.458  | -4.274   | -3.822  | -3.135   | -3.43   | -2.869   | -3.501  | 23.239  | -3.808  | -4.163  | -3.638   | -4.06    | -3.871  | -3.312  | -3.424   | -3.38    | -3.684  | -3.429   | NaN     |
| VL-E53  | -1.15    | -1.15   | -1.182   | NaN     | -1.022   | -1.15   | -1.202   | -1.15   | -0.979  | 0.634   | -1.062  | -1.317   | 1.159    | -1.41   | 1.742   | -1.350   | -1.15    | -1.15   | 1.018    | -1.097  |
| VL-N91  | -21.977  | -45.515 | -48.15   | -37.438 | -31.217  | -46.102 | -34.056  | 39.161  | -34.318 | -51.293 | -37.216 | NaN      | -42.025  | -36.854 | -22.444 | -44.288  | -38.126  | -41.277 | 7.064    | -10.879 |
| VL-N92  | -0.909   | -0.874  | -0.739   | -0.159  | -3.039   | -1.07   | -1.343   | -0.641  | -0.881  | 0.296   | -3.344  | NaN      | -1.127   | -1.294  | -1.312  | -0.786   | -1.755   | -1.083  | -1.311   | -2.183  |
| VL-N93  | -2.085   | -2.604  | -3.254   | 2.933   | 12.623   | -1.437  | -1.211   | -1.736  | 3.748   | -1.305  | 5.231   | NaN      | -0.017   | 2.455   | 4.764   | -1.552   | -2.054   | -2.858  | 9.545    | 11.688  |
| VL-W94  | -17.132  | -17.491 | -14.534  | -13.27  | -16.432  | -14.954 | -18.288  | -7.718  | -4.442  | -5.368  | -10.864 | -18.152  | 276.045  | -13.082 | -14.087 | -15.465  | -12.818  | -11.068 | NaN      | -15.724 |
| VL-P95  | -21.733  | -22.037 | -21.438  | -21.71  | -21.551  | -21.146 | -21.754  | -24.891 | -25.096 | 25.498  | -21.438 | -21.482  | NaN      | -21.56  | -19.964 | -21.586  | -21.031  | -21.154 | -20.47   | -21.426 |
| VL-T96  | -53.792  | -52.261 | -42.822  | -47.102 | -7.989   | -45.774 | -39.372  | -31.497 | -41.32  | -40.731 | -51.203 | -53.5    | -52.772  | -46.901 | -42.759 | -46.079  | NaN      | -47.55  | -37.529  | 31.513  |
| VH-N31  | -0.346   | -0.346  | -0.346   | -0.557  | -0.34    | -0.349  | -0.354   | -0.408  | -0.347  | -0.351  | -0.316  | NaN      | -0.35    | -0.387  | -0.526  | -0.347   | -0.336   | -0.405  | -0.592   | -0.364  |
| VH-H35  | -52.768  | -52.739 | -52.573  | -52.983 | -45.738  | -50.157 | NaN      | -26.813 | -51.505 | -48.701 | -51.9   | -52.675  | -48.868  | -51.913 | -57.592 | -52.969  | -51.922  | -21.52  | -46.932  | -51.71  |
| VH-W47  | -40.459  | -35.579 | -35.387  | -26.774 | -38.41   | -38.137 | -38.376  | -38.521 | -41.487 | -46.806 | -36.92  | -34.908  | -38.731  | -37.519 | -26.506 | -38.26   | -38.99   | -37.667 | NaN      | -38.432 |
| VH-W50  | -119.402 | -121.45 | -115.184 | -117.03 | -104.606 | -48.156 | -121.231 | -57.053 | -48.871 | -99.639 | -99.755 | -118.183 | -126.397 | -57.384 | -50.847 | -119.902 | -110.785 | NaN     | -110.466 | -124.68 |
| VH-W52  | -14.989  | -14.522 | -15.248  | -14.206 | -12.763  | -15.085 | -12.41   | -15.52  | -7.851  | -14.576 | -12.532 | -13.763  | -16.548  | -10.803 | -10.449 | NaN      | -14.723  | -14.94  | -13.027  | -13.228 |
| VH-C64  | -12.743  | -7.632  | 2.402    | 13.652  | 181.088  | NaN     | 43.721   | 98.329  | 47.319  | 289.301 | 40.368  | -0.645   | -0.99    | 11.858  | 54.12   | -12.109  | 22.163   | 79.867  | 65.544   | 176.852 |
| VH-G85  | -16.081  | -15.439 | -16.639  | -15.886 | -16.573  | NaN     | -15.647  | -15.202 | -15.351 | -18.295 | -14.728 | -14.418  | 7.328    | -16.324 | -15.901 | -14.409  | -15.013  | -15.214 | -18.929  | -16.281 |
| VH-N56  | -26.474  | -23.368 | -18.958  | -16.341 | 10.204   | -30.488 | -67.876  | -84.938 | -15.169 | 26.55   | -20.455 | NaN      | -25.387  | -17.853 | -19.564 | -20.847  | -17.688  | -72.015 | -72.443  | -69.438 |
| VH-T57  | -22.009  | -22.143 | -21.523  | -22.385 | -21.894  | -21.748 | -21.873  | -20.083 | -21.586 | -21.997 | -22.016 | -21.577  | -17.567  | -21.639 | -21.684 | -21.943  | NaN      | -22.058 | -21.392  | -21.881 |
| VH-D58  | -71.516  | -71.534 | NaN      | -72.14  | -59.434  | -71.01  | -71.949  | -81.27  | -69.657 | -72.132 | -73.12  | -65.534  | -74.241  | -74.273 | -70.171 | -71.074  | -72.129  | -70.985 | -67.273  | -14.787 |
| VH-T64  | -0.024   | -0.035  | -0.047   | -0.325  | 0.025    | -0.024  | -0.024   | 0.073   | -0.074  | 0.084   | 0.282   | -0.005   | -0.971   | 0.951   | 0       | -0.024   | NaN      | 0.024   | -0.185   | -0.043  |
| VH-T100 | -34.14   | -32.701 | -34.627  | -34.822 | -32.786  | -32.526 | -34.064  | -31.516 | -32.382 | -32.156 | -34.306 | -32.199  | -34.005  | -32.829 | -33.508 | -32.933  | NaN      | -31.12  | -33.494  | -32.415 |
| VH-Y101 | -12.925  | -13.735 | -9.481   | -11.518 | -14.803  | -11.452 | -12.887  | -8.237  | -10.35  | 24.089  | -13.599 | -11.617  | -13.114  | -12.829 | -10.244 | -11.895  | -11.809  | -11.543 | -10.94   | NaN     |
| VH-Y102 | -92.613  | -93.498 | -92.645  | -91.385 | -97.505  | -91.196 | -98.067  | -87.674 | -89.163 | -92.861 | -94.498 | -92.758  | -84.38   | -95.898 | -87.339 | -90.738  | -91.28   | -88.469 | -94.372  | NaN     |
| VH-D103 | -51.237  | -53.001 | NaN      | -44.301 | -50.427  | -50.823 | -51.387  | -38.859 | -45.175 | -45.755 | -53.167 | -53.167  | -50.878  | -48.351 | -47.74  | -52.656  | -53.559  | -53.981 | -50.22   | -46.084 |
| VH-Y104 | -55.529  | -51.304 | -54.137  | -50.915 | -41.163  | -55.716 | -28.71   | -52.019 | -18.898 | -48.083 | -44.551 | -48.881  | -53.542  | -48.719 | 1.041   | -54.215  | -51.92   | -52.005 | -33.584  | NaN     |
| VH-E105 | -35.747  | -36.222 | -37      | NaN     | -34.149  | -35.807 | -34.528  | -35.519 | -34.752 | -28.774 | -34.718 | -35.93   | -25.458  | -34.639 | -33.763 | -26.989  | -35.878  | -36.557 | -33.638  | -41.886 |
| VH-F106 | -31.836  | -33.437 | -30.771  | -31.76  | NaN      | -31.586 | -29.017  | -34.559 | -28.155 | -34.172 | -32.11  | -31.671  | -35.734  | -33.062 | -33.047 | -31.509  | -30.868  | -32.24  | -0.415   | -7.879  |

Supplementary Table 7. The  $\Delta\Delta G$  values for Cluster 3 of EGFR<sup>G465R/</sup>  
Cetuximab<sup>Mut</sup>, Related to Figure 3.

| Residue | A        | C        | D        | E        | F        | G        | H        | I        | K        | L        | M        | N        | P        | Q        | R        | S        | T        | V        | W        | Y        |
|---------|----------|----------|----------|----------|----------|----------|----------|----------|----------|----------|----------|----------|----------|----------|----------|----------|----------|----------|----------|----------|
| VL-D1   | 3.803    | 45.572   | NaN      | 67.777   | 4.101    | 67.465   | 46.006   | 31.977   | 3.897    | 46.601   | -31.917  | 44.284   | 3.872    | 3.882    | -32.143  | 3.813    | 4.204    | 4.181    | 45.216   | 47.077   |
| VL-H2   | 0.274    | 0.123    | -0.119   | 2.897    | 1.671    | 0.241    | 2.466    | NaN      | 7.587    | 7.016    | 2.83     | -0.303   | 0.577    | 11.021   | 8.787    | 0.276    | 1.274    | 0.577    | 1.507    | 1.361    |
| VL-Q27  | -0.513   | -0.953   | -1.547   | 1.621    | 0.366    | 0.087    | 1.368    | 0.606    | 2.866    | 0.657    | -1.404   | 1.079    | -0.326   | NaN      | 1.577    | -0.12    | -0.086   | 1.101    | 0.379    | 0.542    |
| VL-S28  | 43.001   | -0.012   | 0.188    | -35.371  | -36.253  | -36.259  | 0.091    | -36.293  | -36.274  | 3.069    | 0.246    | 0.123    | 0.036    | 0.393    | 41.544   | NaN      | -0.038   | 42.847   | 0.019    | 42.285   |
| VL-N32  | 462.701  | -20.215  | -18.473  | -19.555  | -20.987  | -19.112  | -20.243  | -21.087  | -18.743  | 28.291   | -21.128  | NaN      | -19.729  | -63.139  | -17.27   | -19.247  | 28.286   | -20.77   | -21.66   | -23.055  |
| VL-H34  | -18.473  | -16.532  | -68.766  | -16.369  | -16.369  | -16.301  | NaN      | 50.072   | -18.143  | -61.717  | -18.594  | -18.315  | -61.015  | -18.729  | 28.203   | -12.763  | -13.051  | -12.156  | -18.52   | 50.523   |
| VL-Y90  | -39.91   | -39.921  | -3.424   | -4.573   | 37.327   | -3.021   | 37.75    | -3.722   | 3.168    | 38.151   | 59.129   | 37.999   | -41.869  | 2.48     | -3.54    | 37.934   | 2.11     | 33.905   | -4.259   | NaN      |
| VL-E53  | -38.084  | -1.847   | -1.645   | NaN      | 39.7     | -1.948   | 62.327   | 3.944    | -1.693   | -1.925   | 39.811   | 39.635   | -0.008   | -1.823   | -37.888  | -1.8     | -38.111  | 39.749   | -37.829  | 3.914    |
| VL-N91  | -18.108  | 25.779   | -22.743  | -66.302  | -63.604  | -44.06   | -23.207  | -25.003  | -20.438  | 22.065   | -27.07   | NaN      | -24.086  | -24.802  | -7.144   | -23.169  | -23.656  | 25.271   | -13.801  | -65.87   |
| VL-N82  | -0.092   | 0.092    | 0.571    | 1.276    | 2.963    | 0.346    | 39.261   | -0.384   | 0.114    | 49.606   | 81.864   | NaN      | 0.531    | -36.319  | 42.835   | 2.791    | 2.625    | -0.266   | 0.492    | -1.522   |
| VL-N83  | -32.939  | -0.305   | -0.912   | 27.662   | 69.249   | -0.166   | 10.96    | 0.308    | 6.316    | 3.047    | -38.592  | NaN      | -0.039   | 1.33     | 7.898    | -33.344  | 37.907   | 0.211    | -26.019  | 6.241    |
| VL-W94  | -117.821 | -81.654  | -77.575  | -35.382  | -82.287  | -115.602 | -40.235  | -76.874  | -68.74   | -108.347 | -76.753  | -82.33   | 215.203  | -77.833  | -78.097  | -74.631  | -77.208  | -36.246  | NaN      | -80.362  |
| VL-P95  | 83.694   | -83.781  | -123.16  | -83.885  | -83.591  | -83.724  | -83.344  | -76.548  | -37.341  | -47.107  | -83.433  | -83.605  | NaN      | -38.661  | -76.635  | -77.5    | -84.213  | -82.969  | -79.418  | -83.547  |
| VL-T96  | -77.287  | -93.514  | -87.25   | -93.428  | 4.909    | -95.141  | -87.978  | -83.098  | -42.211  | -88.509  | -38.45   | -85.832  | -123.859 | -83.55   | -88.769  | -79.299  | NaN      | -83.17   | 57.308   | -11.3    |
| VH-N91  | -0.202   | 5.13     | 41.84    | -0.173   | 41.821   | -0.208   | -0.171   | -36.529  | -0.204   | -0.168   | 41.414   | NaN      | 27.519   | -0.266   | -36.374  | -36.433  | 42.519   | 5.142    | -36.632  | -0.2     |
| VH-H35  | -82.006  | -117.464 | -80.574  | -71.464  | -67.374  | -119.29  | NaN      | -109.751 | -110.004 | -50.739  | -78.575  | -80.232  | -39.708  | -113.224 | -76.809  | -81.471  | -26.025  | -73.719  | -32.114  | -108     |
| VH-W47  | -35.316  | -36.066  | 28.326   | -35.603  | -28.747  | -35.457  | 9.851    | 8.532    | -31.268  | -42.286  | -72.698  | -71.693  | 7.191    | 7.958    | 10.323   | -35.445  | 5.721    | -7.515   | NaN      | -69.772  |
| VH-V50  | -65.567  | -131.309 | -95.314  | -135.691 | -52.289  | -96.591  | -73.634  | -89.503  | -128.725 | -138.093 | -90.998  | -52.978  | -58.271  | -101.634 | -87.366  | -31.821  | -96.606  | NaN      | -86.453  | -194.855 |
| VH-S1   | -65.378  | -55.619  | 8.345    | -55.418  | -13.653  | -55.439  | -50.169  | NaN      | -55.384  | -91.645  | -55.445  | -55.478  | -52.851  | -13.863  | -13.725  | -55.387  | -13.81   | -55.559  | -55.416  | -52.778  |
| VH-W62  | -174.054 | -218.377 | -217.171 | -216.782 | -221.42  | -216.466 | -202.023 | -216.422 | -137.418 | -214.014 | -212.503 | -253.06  | -252.422 | -214.085 | -194.546 | -216.427 | -254.844 | -246.995 | NaN      | -215.06  |
| VH-S53  | -6.594   | -95.473  | -46.101  | -95.452  | -43.978  | -49.004  | 11.602   | -7.953   | -3.491   | -6.558   | -42.584  | -46.135  | -87.299  | -7.108   | -46.845  | NaN      | -48.87   | -85.814  | -28.738  | -17.48   |
| VH-G54  | -41.394  | -41.974  | -34.326  | 8.809    | -14.572  | NaN      | 31.692   | 48.637   | 88.621   | 495.641  | -56.9    | -26.69   | -37.334  | 11.787   | 84.124   | -40.622  | -0.451   | 36.038   | 41.851   | -36.683  |
| VH-G55  | -87.496  | -50.765  | 12.131   | -8.325   | -50.661  | NaN      | -50.663  | -8.929   | -50.487  | -50.997  | -86.52   | -50.21   | -44.851  | -50.913  | -51.257  | -50.254  | -50.11   | -8.378   | -53.869  | -87.265  |
| VH-N86  | -107.83  | -98.118  | -93.832  | -85.644  | 0.549    | -149.743 | -95.793  | -111.175 | 84.909   | 62.311   | -36.929  | NaN      | -100.815 | -86.952  | -85.093  | -102.777 | -85.81   | -80.316  | 4.174    | -86.863  |
| VH-T57  | 89.159   | -125.291 | 93.604   | -83.75   | -129.175 | -88.923  | -88.87   | -83.059  | -129.183 | -93.067  | -129.356 | -129.204 | -53.583  | -83.166  | -125.133 | -51.551  | NaN      | -89.355  | -88.664  | -50.634  |
| VH-D56  | -54.628  | -100.538 | NaN      | -100.511 | -90.661  | -129.226 | -126.268 | -86.488  | -88.226  | -83.334  | -60.232  | -53.638  | -72.805  | -99.887  | -88.594  | -77.957  | -86.038  | -48.016  | -81.477  | -36.688  |
| VH-T64  | -0.019   | 5.57     | -0.044   | 42.42    | 0.027    | -36.283  | -0.019   | -36.225  | 0.065    | 0.04     | 42.636   | -0.048   | -0.403   | 42.368   | -36.481  | -0.019   | NaN      | -36.243  | -36.218  | 5.73     |
| VH-T100 | -18.355  | -18.038  | -18.598  | -19.546  | -54.338  | 23.377   | -18.029  | -53.003  | -18.066  | -54.096  | 9.39     | 23.603   | -16.494  | -17.8    | -19.122  | 23.743   | NaN      | -17.439  | -55.11   | 23.375   |
| VH-Y101 | 22.004   | -42.915  | -38.917  | 0.762    | -43.955  | -40.666  | -42.489  | -39.388  | -39.91   | -10.916  | -42.618  | -41.018  | -42.111  | 21.982   | -39.908  | 23.016   | -41.423  | -0.782   | -34.277  | NaN      |
| VH-Y102 | -111.258 | -106.465 | -110.943 | -112.549 | -73.678  | -109.979 | -71.424  | -104.984 | -106.061 | -108.619 | -147.933 | -69.489  | -70.02   | -69.749  | -43.155  | -110.481 | -106.519 | -106.403 | -108.234 | NaN      |
| VH-D103 | -71.708  | -78.715  | NaN      | -74.116  | -76.494  | -76.774  | -74.801  | -72.061  | -74.391  | -77.208  | -114.114 | -123.815 | -74.354  | -74.354  | -72.222  | -115.524 | -35.964  | -121.901 | -110.744 | -108.141 |
| VH-Y104 | 96.602   | -85.292  | -131.587 | 90.987   | -90.667  | 97.314   | -39.938  | -88.061  | -121.083 | -87.216  | -126.59  | -89.698  | -51.742  | -88.644  | -87.781  | -51.688  | -130.784 | -93.984  | -87.087  | NaN      |
| VH-E105 | -22.212  | -27.368  | 14.142   | NaN      | -25.842  | 13.991   | -25.282  | -27.904  | -27.589  | -27.331  | 13.326   | -27.287  | -82.32   | 15.015   | -23.405  | -27.408  | -27.325  | -27.67   | -21.305  | 9.08     |
| VH-F106 | -31.321  | -67.597  | -31.402  | NaN      | -67.598  | -31.324  | 10.084   | -31.324  | -36.588  | -31.576  | 10.145   | -31.360  | -75.858  | -31.423  | -32.58   | -31.393  | -31.414  | -67.487  | 11.254   | -26.403  |

**Supplementary Table 8. All kon, koff, and KD values in three technical replicates, Related to Fig. 4.**

|           | Experiment #1                |                       |                       | Experiment #2                |                       |                       | Experiment #3                |                       |                       |
|-----------|------------------------------|-----------------------|-----------------------|------------------------------|-----------------------|-----------------------|------------------------------|-----------------------|-----------------------|
|           | Avidity to WT-EGFR-ECD-Fc    |                       |                       | Avidity to WT-EGFR-ECD-Fc    |                       |                       | Avidity to WT-EGFR-ECD-Fc    |                       |                       |
|           | Kon                          | Koff                  | KD                    | Kon                          | Koff                  | KD                    | Kon                          | Koff                  | KD                    |
|           | (1/Ms)                       | (1/s)                 | (M)                   | (1/Ms)                       | (1/s)                 | (M)                   | (1/Ms)                       | (1/s)                 | (M)                   |
| Cetuximab | 2.87X10 <sup>5</sup>         | 1.17X10 <sup>-4</sup> | 0.41X10 <sup>-9</sup> | 1.38X10 <sup>5</sup>         | 9.26X10 <sup>-5</sup> | 0.67X10 <sup>-9</sup> | 8.03X10 <sup>4</sup>         | 9.06X10 <sup>-6</sup> | 0.11X10 <sup>-9</sup> |
| Ctx-VY    | 5.24X10 <sup>4</sup>         | 2.10X10 <sup>-4</sup> | 4.00X10 <sup>-9</sup> | 4.57X10 <sup>4</sup>         | 4.44X10 <sup>-5</sup> | 0.97X10 <sup>-9</sup> | 7.49X10 <sup>4</sup>         | 1.33X10 <sup>-4</sup> | 1.77X10 <sup>-9</sup> |
| Ctx-Y104D | 8.06X10 <sup>4</sup>         | 5.17X10 <sup>-4</sup> | 6.54X10 <sup>-9</sup> | 6.05X10 <sup>4</sup>         | 1.26X10 <sup>-4</sup> | 2.08X10 <sup>-9</sup> | 1.05X10 <sup>5</sup>         | 2.79X10 <sup>-4</sup> | 2.66X10 <sup>-9</sup> |
| Ctx-W52D  | 1.37X10 <sup>5</sup>         | 1.35X10 <sup>-4</sup> | 0.99X10 <sup>-9</sup> | 8.21X10 <sup>4</sup>         | 5.80X10 <sup>-5</sup> | 0.71X10 <sup>-9</sup> | 1.05X10 <sup>5</sup>         | 7.03X10 <sup>-5</sup> | 0.67X10 <sup>-9</sup> |
|           | Avidity to S492R-EGFR-ECD-Fc |                       |                       | Avidity to S492R-EGFR-ECD-Fc |                       |                       | Avidity to S492R-EGFR-ECD-Fc |                       |                       |
|           | Kon                          | Koff                  | KD                    | Kon                          | Koff                  | KD                    | Kon                          | Koff                  | KD                    |
|           | (1/Ms)                       | (1/s)                 | (M)                   | (1/Ms)                       | (1/s)                 | (M)                   | (1/Ms)                       | (1/s)                 | (M)                   |
| Cetuximab | N.D.*                        | N.D.                  | N.D.                  | N.D.                         | N.D.                  | N.D.                  | N.D.                         | N.D.                  | N.D.                  |
| Ctx-VY    | 1.50X10 <sup>5</sup>         | 5.53X10 <sup>-4</sup> | 3.68X10 <sup>-9</sup> | 8.74X10 <sup>4</sup>         | 1.47X10 <sup>-4</sup> | 1.68X10 <sup>-9</sup> | 9.21X10 <sup>4</sup>         | 1.40X10 <sup>-4</sup> | 1.52X10 <sup>-9</sup> |
| Ctx-Y104D | 1.12X10 <sup>5</sup>         | 4.07X10 <sup>-4</sup> | 3.63X10 <sup>-9</sup> | 9.52X10 <sup>4</sup>         | 1.07X10 <sup>-4</sup> | 1.13X10 <sup>-9</sup> | 2.41X10 <sup>5</sup>         | 2.96X10 <sup>-4</sup> | 1.23X10 <sup>-9</sup> |
|           | Avidity to G465R-EGFR-ECD-Fc |                       |                       | Avidity to G465R-EGFR-ECD-Fc |                       |                       | Avidity to G465R-EGFR-ECD-Fc |                       |                       |
|           | Kon                          | Koff                  | KD                    | Kon                          | Koff                  | KD                    | Kon                          | Koff                  | KD                    |
|           | (1/Ms)                       | (1/s)                 | (M)                   | (1/Ms)                       | (1/s)                 | (M)                   | (1/Ms)                       | (1/s)                 | (M)                   |
| Cetuximab | N.D.                         | N.D.                  | N.D.                  | N.D.                         | N.D.                  | N.D.                  | N.D.                         | N.D.                  | N.D.                  |
| Ctx-W52D  | 3.11X10 <sup>5</sup>         | 1.05X10 <sup>-3</sup> | 3.39X10 <sup>-9</sup> | 1.47X10 <sup>4</sup>         | 6.82X10 <sup>-4</sup> | 4.64X10 <sup>-9</sup> | 9.73X10 <sup>4</sup>         | 5.49X10 <sup>-4</sup> | 5.64X10 <sup>-9</sup> |

\*N.D., not determined

**Supplementary Table 9. Primers used in this study**

| Gene name          | primer sequence                                                                                                                                                                                                                            |
|--------------------|--------------------------------------------------------------------------------------------------------------------------------------------------------------------------------------------------------------------------------------------|
| WT-EGFR            | Overlap-F: TTTGGGACCTCCGGTCAGAAAACCAAATTATAAGCAACAGAGGTGAAAACAGCTGCAA<br>Overlap-R: TTGCAGCTGTTTTACCTCTGTTGCTTATAATTTGGTTTTCTGACCGGAGGTCCCAA                                                                                               |
| S492R-EGFR         | Overlap-F: TTTGGGACCTCCGGTCAGAAAACCAAATT AAGAGAAACA GAGGTGAAAA CAGCTGCAA<br>Overlap-R: TTGCAGCTGTTTTACCTCTGTTTCTTAATTTGGTTTTCTGACCGGAGGTCCCAA                                                                                              |
| I491M-EGFR         | Overlap-F: TTTGGGACCTCCGGTCAGAA AACCAAATT ATGAGCAACA GAGGTGAAAA CAGCTGCAA<br>Overlap-R: TTGCAGCTGTTTTACCTCTGTTGCTCATAATTTGGTTTTCTGACCGGAGGTCCCAA                                                                                           |
| K489E-EGFR         | Overlap-F: TTTGGGACCTCCGGTCAGAAAACCGAGATTATAAGCAACA GAGGTGAAAA CAGCTGCAA<br>Overlap-R: TTGCAGCTGTTTTACCTCTGTTGCTTATAATCTCGTTTTCTGACCGGAGGTCCCAA                                                                                            |
| K467T-EGFR         | Overlap-F: GGAGATAAGTGATGGAGATGTGATAATTCAGGAAACACCAATTTGTGCTATGCAAATA<br>Overlap-R: TATTTGCATAGCACAAATTTGGTGTTCCTGAAATTATCACATCTCCATCACTTATCTCC                                                                                            |
| G465R-EGFR         | Overlap-F: GGAGATAAGTGATGGAGATGTGATAATTCAGGAAACAAAAATTTGTGCTATGCAAATA<br>Overlap-R: TATTTGCATAGCACAAATTTTGTCTTGAAATTATCACATCTCCATCACTTATCTCC                                                                                               |
| G465E-EGFR         | Overlap-F: GGAGATAAGTGATGGAGATGTGATAATTCAGAGAACAAAAATTTGTGCTATGCAAATA<br>Overlap-R: TATTTGCATAGCACAAATTTTGTCTCTGAAATTATCACATCTCCATCACTTATCTCC                                                                                              |
| S464L-EGFR         | Overlap-F: GGAGATAAGTGATGGAGATGTGATAATTCAGGAAACAAAAATTTGTGCTATGCAAATA<br>Overlap-R: TATTTGCATAGCACAAATTTTGTTCCTGAAATTATCACATCTCCATCACTTATCTCC                                                                                              |
| I462R-EGFR         | Overlap-F: GGAGATAAGTGATGGAGATGTGAGAATTCAGGAAACAAAAATTTGTGCTATGCAAATA<br>Overlap-R: TATTTGCATAGCACAAATTTTGTTCCTGAAATTATCACATCTCCATCACTTATCTCC                                                                                              |
| R451C-EGFR         | Overlap-F: CTGAACATAACATCCTTGGGATTATGCTCCCTCAAGGAGATAAGTGATGGAGAT<br>Overlap-R: ATCTCCATCACTTATCTCCTTGAGGGAGCATAATCCCAAGGATGTTATGTTTCAG                                                                                                    |
| S442R-EGFR         | Overlap-F: ACATGGTCAGTTTTCTCTTGCACTCGTCAGGCTGAACATAACATCCTTGGGATTACGCT<br>Overlap-R: AGCGTAATCCCAAGGATGTTATGTTACGCTGACGACTGCAAGAGAAAAGTACCATGT                                                                                             |
| V441D-EGFR         | Overlap-F: ACATGGTCAGTTTTCTCTTGCACTCGACGCCTGAACATAACATCCTTGGGATTACGCT<br>Overlap-R: AGCGTAATCCCAAGGATGTTATGTTACGCTGTCGACTGCAAGAGAAAAGTACCATGT                                                                                              |
| WT/MUT-EGFR        | F: CCGGATATCATGCGACCCTCCGGACGGCCGGGCAGCGCTCTGGCGCTGCTGGCTGC<br>R: CCGCTCGAGTCATGCTCCAATAAATCACTGCTTTGTGGCGCGACCCTTAGGTATTCTG                                                                                                               |
| WT/MUT-EGFR-eGFP   | Overlap-F: ACAAAGCAGTGAATTTATTGGAGCAATGGTGAGCAAGGGCGAGGAGCT<br>Overlap-R: AGCTCCTCGCCCTTGCTCACCATTGCTCCAATAAATCACTGCTTTGT<br>F: GGGGTACCATGCGACCCTCCGGGACGG<br>R: GCTCTAGAGCTCAAAGCTTCTTGACAGCTCGT                                         |
| WT/MUT-EGFR-ECD-Fc | Overlap-F: GGGCCTAAGATCCCGTCCATCGAGCCAAATCTGTGACAAA<br>Overlap-R: TTTGTCACAAGATTTGGGCTCGATGGACGGGATCTTAGGCC<br>F: CTGGGACTGCTCCTGCTGTGGTTTCCCGGCGCAGATGCTGGAGGAAAAGAAAGTTG<br>R: TTTATAGCGGCGCTCATTACCCGGAGACAGGGAGAGGCTCTTCTGCGTGTAGTGGTT |
| Ctx-Y104X          | Overlap-F: GCGCTCTGACCTATTACGATNNSGAGTTCGCGTATTGGGGTCA<br>Overlap-R: TGACCCCAATACGCGAACTCSNNAICGTAATAGGTCAGAGCGC<br>F: GTGGCGGCGCTCGAGATGGATATGAGGGTGCCTGCCAGCTGCTGGGACTG<br>R: GCCCTCTAGACTCGAGTCATTACCCGGAGACAGGGAGAGG                   |
| Ctx-W52D           | Overlap-F: AAGGCCTGGAATGGCTGGGTGTAATCANNKAGCGGCGGTAACACCGACTACAAT<br>Overlap-R: GATTACACCCAGCCATTCCAGGCCTTTGCCAGGGCTCTGACGCACCC                                                                                                            |

|                                            |                                                                                                                                                                                                                                                                                                                                                                                                                                                                                                                                                                                                                                                                                                                                                                |
|--------------------------------------------|----------------------------------------------------------------------------------------------------------------------------------------------------------------------------------------------------------------------------------------------------------------------------------------------------------------------------------------------------------------------------------------------------------------------------------------------------------------------------------------------------------------------------------------------------------------------------------------------------------------------------------------------------------------------------------------------------------------------------------------------------------------|
|                                            | <p>F: GTGGCGCCGCTCGAGATGGATATGAGGGTGCCTGCCAGCTGCTGGGACTG</p> <p>R: GCCCTCTAGACTCGAGTCATTTACCCGGAGACAGGGAGAGG</p>                                                                                                                                                                                                                                                                                                                                                                                                                                                                                                                                                                                                                                               |
| Ctx-VY                                     | <p>Overlap-F1: AAGGCCTGGAATGGCTGGGTGATGATCTGGAGCGGCGTAACAC</p> <p>Overlap-R1: GTGTTACCGCCGCTCCAGATCTGACCCAGCCATTCCAGGCCTT</p> <p>Overlap-F2: GCGCTCTGACCTATTACGATGTGGAGTTCGCGTATTGGGGTCA</p> <p>Overlap-R2: TGACCCAATACGCGAACTCCACATCGTAATAGGTCAGAGCGC</p> <p>F: GTGGCGCCGCTCGAGATGGATATGAGGGTGCCTGCCAGCTGCTGGGACTG</p> <p>R: GCCCTCTAGACTCGAGTCATTTACCCGGAGACAGGGAGAGG</p>                                                                                                                                                                                                                                                                                                                                                                                    |
| Ctx-Y104D                                  | <p>Overlap-F1: CTGACCTATTACGATGATGAGTTCGCGTAT</p> <p>Overlap-R1: ATACGCGAACTCATCATCGTAATAGGTCAG</p> <p>F: GTGGCGCCGCTCGAGATGGATATGAGGGTGCCTGCCAGCTGCTGGGACTG</p> <p>R: GCCCTCTAGACTCGAGTCATTTACCCGGAGACAGGGAGAGG</p>                                                                                                                                                                                                                                                                                                                                                                                                                                                                                                                                           |
| Ctx-DD                                     | <p>Overlap-F1: AAGGCCTGGAATGGCTGGGTGTAATCNKAGCGGCGTAACACCGACTACAAT</p> <p>Overlap-R1: GATTACACCAGCCATTCCAGGCCTTTGCCAGGGCTCTGACGCACCC</p> <p>Overlap-F2: CTGACCTATTACGATGATGAGTTCGCGTAT</p> <p>Overlap-R2: ATACGCGAACTCATCATCGTAATAGGTCAG</p> <p>F: GTGGCGCCGCTCGAGATGGATATGAGGGTGCCTGCCAGCTGCTGGGACTG</p> <p>R: GCCCTCTAGACTCGAGTCATTTACCCGGAGACAGGGAGAGG</p>                                                                                                                                                                                                                                                                                                                                                                                                  |
| Ctx-VWY                                    | <p>Overlap-F1: AAGGCCTGGAATGGCTGGGTGATGATCGACAGCGGCGTAACAC</p> <p>Overlap-R1: GTGTTACCGCCGCTGTCGATCTGACCCAGCCATTCCAGGCCTT</p> <p>Overlap-F2: GCGCTCTGACCTATTACGATGTGGAGTTCGCGTATTGGGGTCA</p> <p>Overlap-R2: TGACCCAATACGCGAACTCCACATCGTAATAGGTCAGAGCGC</p> <p>F: GTGGCGCCGCTCGAGATGGATATGAGGGTGCCTGCCAGCTGCTGGGACTG</p> <p>R: GCCCTCTAGACTCGAGTCATTTACCCGGAGACAGGGAGAGG</p>                                                                                                                                                                                                                                                                                                                                                                                    |
| Cetuximab-scFv library<br>Related to S492R | <p>F: ATGCGGCCAGCCGGCCAGGTTCAACTGAAACAGTCCGG</p> <p>R: AAATATGCGGCCGCTTTTCAGTTCAGTTTCGTTGCCGGCACCGAAAGT</p> <p>Overlap-F1: CCTGGAATGGCTGGGTNNSATCTGGAGCGGCGTAACACCNSTACAATACCCATTCA</p> <p>Overlap-R1: TGAATGGGGTATTGTASNNGGTGTTACCGCCGCTCCAGATSNNACCCAGCCATTCCAGG</p> <p>Overlap-F2: GCGCTCTGACCTATTACGATNNSGAGTTCGCGTATTGGGGTCAAGGCACTCTGGTTACC</p> <p>Overlap-R2: GGTAACCAGAGTGCCCTGACCCCAATACGCGAACTCSNNATCGTAATAGGTCAGAGCGC</p> <p>Overlap-F3: AGCTTTTCTTGCCGCGCTCCCAAAGCATTGGTACCNNSATTCACTGGTACCAGCAGCG</p> <p>Overlap-R3: CGCTGCTGGTACCAGTGAATSNNGGTACCAATGCTTTGGGACGCGCGCAAGAAAAGCT</p> <p>Overlap-F4: GCTGACTACTATTGTCAGCAGAACAATAACNNSCCGNNSACTTTCGGTGCCGGCACGAA</p> <p>Overlap-R4: TTCGTGCCGGCACCGAAAGTSNNGGNSNNGTTATTGTTCTGCTGACAATAGTAGTCAGC</p> |
| Cetuximab-scFv library<br>Related to G465R | <p>F: ATGCGGCCAGCCGGCCAGGTTCAACTGAAACAGTCCGG</p> <p>R: AAATATGCGGCCGCTTTTCAGTTCAGTTTCGTTGCCGGCACCGAAAGT</p> <p>Overlap-F1: CCTGGAATGGCTGGGTNNSATCNNSAGCGGCGTAACACCNSTACAATACCCATTCA</p> <p>Overlap-R1: TGAATGGGGTATTGTASNNGGTGTTACCGCCGCTSNNGATSNNACCCAGCCATTCCAGG</p>                                                                                                                                                                                                                                                                                                                                                                                                                                                                                         |

## Supplementary References

1. S. Arena, B. Bellosillo, G. Siravegna, A. Martinez, I. Canadas, L. Lazzari, N. Ferruz, M. Russo, S. Misale, I. Gonzalez, M. Iglesias, E. Gavilan, G. Corti, S. Hobor, G. Crisafulli, M. Salido, J. Sanchez, A. Dalmases, J. Bellmunt, G. De Fabritiis, A. Rovira, F. Di Nicolantonio, J. Albanell, A. Bardelli, C. Montagut, Emergence of Multiple EGFR Extracellular Mutations during Cetuximab Treatment in Colorectal Cancer. *Clin Cancer Res* **21**, 2157-2166 (2015).
2. C. Montagut, A. Dalmases, B. Bellosillo, M. Crespo, S. Pairet, M. Iglesias, M. Salido, M. Gallen, S. Marsters, S. P. Tsai, A. Minoche, S. Seshagiri, S. Serrano, H. Himmelbauer, J. Bellmunt, A. Rovira, J. Settleman, F. Bosch, J. Albanell, Identification of a mutation in the extracellular domain of the Epidermal Growth Factor Receptor conferring cetuximab resistance in colorectal cancer. *Nat Med* **18**, 221-223 (2012).
3. Bertotti, A., Papp, E., Jones, S. et al. The genomic landscape of response to EGFR blockade in colorectal cancer. *Nature* **526**, 263–267 (2015).
4. F. Braig, M. Marz, A. Schieferdecker, A. Schulte, M. Voigt, A. Stein, T. Grob, M. Alawi, D. Indenbirken, M. Kriegs, E. Engel, U. Vanhoefer, A. Grundhoff, S. Loges, K. Riecken, B. Fehse, C. Bokemeyer, M. Binder, Epidermal growth factor receptor mutation mediates cross-resistance to panitumumab and cetuximab in gastrointestinal cancer. *Oncotarget* **6**, 12035-12047 (2015).

## Supplementary Fig. 2a uncropped scans of gel

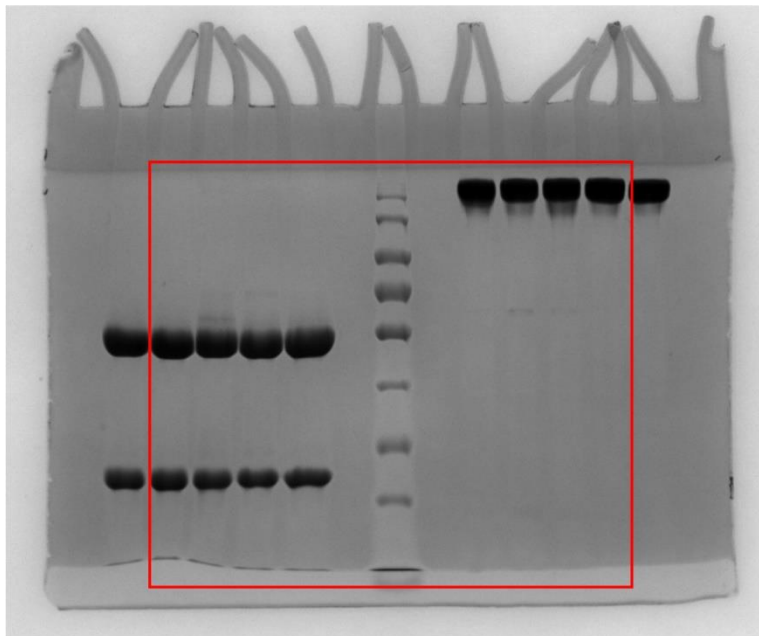



Supplementary Fig. 3 uncropped scans of gels

a

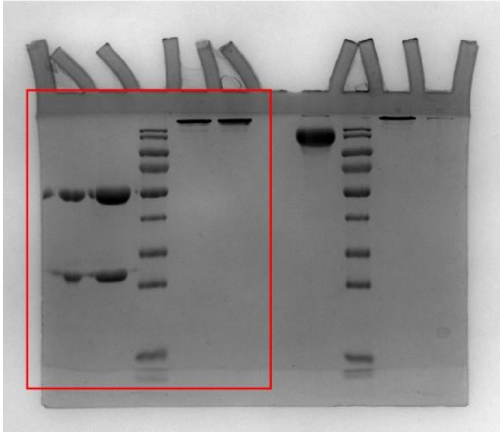

b

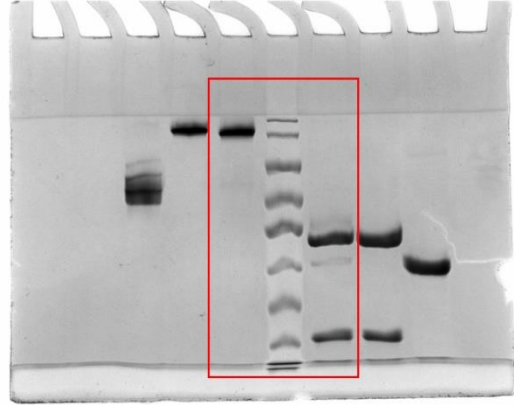

c

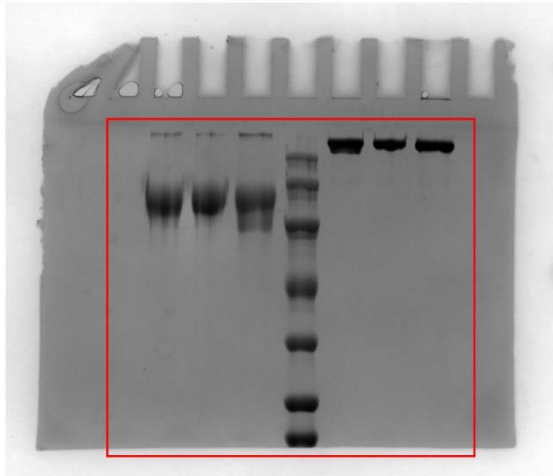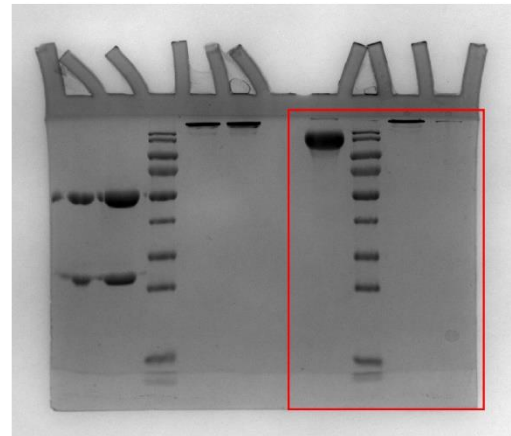

d

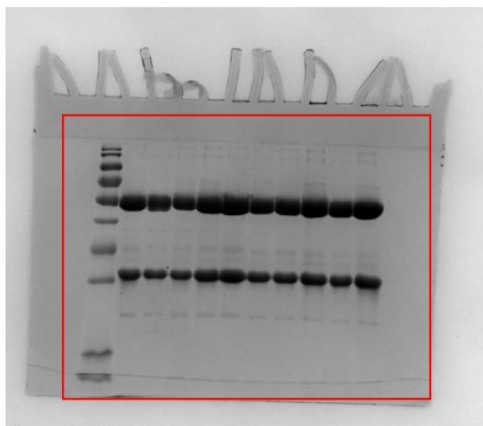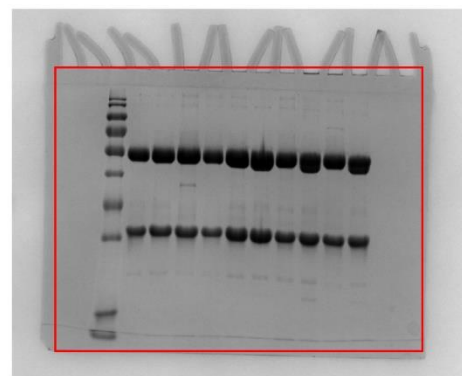

Supplement: 41467_2022_32159_MOESM1_ESM.pdf [file 41467_2022_32159_MOESM1_ESM.pdf]
