# Supplementary material for: Structure-guided and phage-assisted evolution of a therapeutic anti-EGFR antibody to reverse acquired resistance
Source: PubMed Central journal article supplement (PMC9338999; doi:10.1038/s41467-022-32159-6), 2022-07-30
Supplement: 41467_2022_32159_MOESM3_ESM.pdf [file 41467_2022_32159_MOESM3_ESM.pdf]

File name: Supplementary Data 1

Description: The  $\Delta\Delta G$  values for Cluster 1 of EGFR<sup>S492R</sup>/Cetuximab<sup>Mut</sup>.

File name: Supplementary Data 2

Description: The  $\Delta\Delta G$  values for Cluster 2 of EGFR<sup>S492R</sup>/Cetuximab<sup>Mut</sup>.

File name: Supplementary Data 3

Description: The  $\Delta\Delta G$  values for Cluster 3 of EGFR<sup>S492R</sup>/Cetuximab<sup>Mut</sup>.

File name: Supplementary Data 4

Description: The  $\Delta\Delta G$  values for Cluster 1 of EGFR<sup>G465R</sup>/Cetuximab<sup>Mut</sup>.

File name: Supplementary Data 5

Description: The  $\Delta\Delta G$  values for Cluster 2 of EGFR<sup>G465R</sup>/Cetuximab<sup>Mut</sup>.

File name: Supplementary Data 6

Description: The  $\Delta\Delta G$  values for Cluster 3 of EGFR<sup>G465R</sup>/Cetuximab<sup>Mut</sup>.
